# Supplementary material for: Optimized Gaussian naïve Bayes for prostate cancer detection in White patients using gene expression data
Source: PeerJ journal article supplement (doi:10.7717/peerj-cs.3405), 2025-12-02
Supplement: Supplementary_File.xlsx [file Supplementary_File.xlsx]

## Sheet: Final Results (2)
Column1	Column2	Column3	Column4	Column5	Column6	Column7	Column8	Column9	Column10	Column11	Column12	Column13
Jumlah Gene	Split_Ratio	Initial_No_of_cancer	Initial_No_of_normal	Before_Splitting	No. of cancer in Train	No. of normal in Train	No. of cancer in Test	No. of normal in Test	Hyperparameter	Test_Accuracy	Train_Classification_Report	Classification_Report
139	0.7/0.3	414	44	No Balancing	293	27	121	17	no	0.9492753623188406	precision recall f1-score support cancer 0.98 0.96 0.97 293 normal 0.63 0.81 0.71 27 accuracy 0.94 320 macro avg 0.81 0.89 0.84 320 weighted avg 0.95 0.94 0.95 320	precision recall f1-score support cancer 0.97 0.98 0.97 121 normal 0.81 0.76 0.79 17 accuracy 0.95 138 macro avg 0.89 0.87 0.88 138 weighted avg 0.95 0.95 0.95 138
13	0.7/0.3	414	44	KMeansSMOTE	293	102	121	17	yes	0.9492753623188406	precision recall f1-score support cancer 0.99 0.92 0.95 293 normal 0.81 0.97 0.88 102 accuracy 0.93 395 macro avg 0.90 0.95 0.92 395 weighted avg 0.94 0.93 0.94 395	precision recall f1-score support cancer 0.97 0.97 0.97 121 normal 0.78 0.82 0.80 17 accuracy 0.95 138 macro avg 0.88 0.90 0.89 138 weighted avg 0.95 0.95 0.95 138
13	0.7/0.3	414	44	KMeansSMOTE	293	102	121	17	no	0.9492753623188406	precision recall f1-score support cancer 0.99 0.92 0.95 293 normal 0.81 0.97 0.88 102 accuracy 0.93 395 macro avg 0.90 0.95 0.92 395 weighted avg 0.94 0.93 0.94 395	precision recall f1-score support cancer 0.97 0.97 0.97 121 normal 0.78 0.82 0.80 17 accuracy 0.95 138 macro avg 0.88 0.90 0.89 138 weighted avg 0.95 0.95 0.95 138
139	0.7/0.3	414	44	No Balancing	293	27	121	17	yes	0.9492753623188406	precision recall f1-score support cancer 0.98 0.96 0.97 293 normal 0.63 0.81 0.71 27 accuracy 0.94 320 macro avg 0.81 0.89 0.84 320 weighted avg 0.95 0.94 0.95 320	precision recall f1-score support cancer 0.97 0.98 0.97 121 normal 0.81 0.76 0.79 17 accuracy 0.95 138 macro avg 0.89 0.87 0.88 138 weighted avg 0.95 0.95 0.95 138
139	0.6/0.4	414	44	No Balancing	251	23	163	21	no	0.9456521739130435	precision recall f1-score support cancer 0.98 0.96 0.97 251 normal 0.65 0.74 0.69 23 accuracy 0.95 274 macro avg 0.81 0.85 0.83 274 weighted avg 0.95 0.95 0.95 274	precision recall f1-score support cancer 0.98 0.96 0.97 163 normal 0.74 0.81 0.77 21 accuracy 0.95 184 macro avg 0.86 0.89 0.87 184 weighted avg 0.95 0.95 0.95 184
139	0.6/0.4	414	44	No Balancing	251	23	163	21	yes	0.9456521739130435	precision recall f1-score support cancer 0.98 0.96 0.97 251 normal 0.65 0.74 0.69 23 accuracy 0.95 274 macro avg 0.81 0.85 0.83 274 weighted avg 0.95 0.95 0.95 274	precision recall f1-score support cancer 0.98 0.96 0.97 163 normal 0.74 0.81 0.77 21 accuracy 0.95 184 macro avg 0.86 0.89 0.87 184 weighted avg 0.95 0.95 0.95 184
139	0.7/0.3	414	44	RandomOverSampler	293	102	121	17	yes	0.9420289855072463	precision recall f1-score support cancer 0.94 0.93 0.94 293 normal 0.80 0.84 0.82 102 accuracy 0.91 395 macro avg 0.87 0.89 0.88 395 weighted avg 0.91 0.91 0.91 395	precision recall f1-score support cancer 0.98 0.95 0.97 121 normal 0.71 0.88 0.79 17 accuracy 0.94 138 macro avg 0.85 0.92 0.88 138 weighted avg 0.95 0.94 0.94 138
139	0.7/0.3	414	44	RandomOverSampler	293	102	121	17	no	0.9420289855072463	precision recall f1-score support cancer 0.94 0.93 0.94 293 normal 0.80 0.84 0.82 102 accuracy 0.91 395 macro avg 0.87 0.89 0.88 395 weighted avg 0.91 0.91 0.91 395	precision recall f1-score support cancer 0.98 0.95 0.97 121 normal 0.71 0.88 0.79 17 accuracy 0.94 138 macro avg 0.85 0.92 0.88 138 weighted avg 0.95 0.94 0.94 138
139	0.6/0.4	414	44	RandomOverSampler	251	87	163	21	no	0.9402173913043478	precision recall f1-score support cancer 0.96 0.96 0.96 251 normal 0.87 0.87 0.87 87 accuracy 0.93 338 macro avg 0.91 0.91 0.91 338 weighted avg 0.93 0.93 0.93 338	precision recall f1-score support cancer 0.99 0.94 0.97 163 normal 0.68 0.90 0.78 21 accuracy 0.94 184 macro avg 0.83 0.92 0.87 184 weighted avg 0.95 0.94 0.94 184
139	0.6/0.4	414	44	RandomOverSampler	251	87	163	21	yes	0.9402173913043478	precision recall f1-score support cancer 0.96 0.96 0.96 251 normal 0.87 0.87 0.87 87 accuracy 0.93 338 macro avg 0.91 0.91 0.91 338 weighted avg 0.93 0.93 0.93 338	precision recall f1-score support cancer 0.99 0.94 0.97 163 normal 0.68 0.90 0.78 21 accuracy 0.94 184 macro avg 0.83 0.92 0.87 184 weighted avg 0.95 0.94 0.94 184
139	0.8/0.2	414	44	RandomOverSampler	333	116	81	11	no	0.9347826086956522	precision recall f1-score support cancer 0.97 0.95 0.96 333 normal 0.87 0.91 0.89 116 accuracy 0.94 449 macro avg 0.92 0.93 0.92 449 weighted avg 0.94 0.94 0.94 449	precision recall f1-score support cancer 0.96 0.96 0.96 81 normal 0.73 0.73 0.73 11 accuracy 0.93 92 macro avg 0.85 0.85 0.85 92 weighted avg 0.93 0.93 0.93 92
139	0.7/0.3	414	44	SMOTEENN	267	89	121	17	no	0.9347826086956522	precision recall f1-score support cancer 0.98 1.00 0.99 267 normal 0.99 0.94 0.97 89 accuracy 0.98 356 macro avg 0.98 0.97 0.98 356 weighted avg 0.98 0.98 0.98 356	precision recall f1-score support cancer 0.98 0.94 0.96 121 normal 0.68 0.88 0.77 17 accuracy 0.93 138 macro avg 0.83 0.91 0.87 138 weighted avg 0.95 0.93 0.94 138
139	0.8/0.2	414	44	RandomOverSampler	333	116	81	11	yes	0.9347826086956522	precision recall f1-score support cancer 0.97 0.95 0.96 333 normal 0.87 0.91 0.89 116 accuracy 0.94 449 macro avg 0.92 0.93 0.92 449 weighted avg 0.94 0.94 0.94 449	precision recall f1-score support cancer 0.96 0.96 0.96 81 normal 0.73 0.73 0.73 11 accuracy 0.93 92 macro avg 0.85 0.85 0.85 92 weighted avg 0.93 0.93 0.93 92
139	0.7/0.3	414	44	SMOTEENN	267	89	121	17	yes	0.9347826086956522	precision recall f1-score support cancer 0.98 1.00 0.99 267 normal 0.99 0.94 0.97 89 accuracy 0.98 356 macro avg 0.98 0.97 0.98 356 weighted avg 0.98 0.98 0.98 356	precision recall f1-score support cancer 0.98 0.94 0.96 121 normal 0.68 0.88 0.77 17 accuracy 0.93 138 macro avg 0.83 0.91 0.87 138 weighted avg 0.95 0.93 0.94 138
139	0.6/0.4	414	44	SMOTEENN	224	75	163	21	yes	0.9293478260869565	precision recall f1-score support cancer 0.99 0.99 0.99 224 normal 0.97 0.96 0.97 75 accuracy 0.98 299 macro avg 0.98 0.98 0.98 299 weighted avg 0.98 0.98 0.98 299	precision recall f1-score support cancer 0.99 0.93 0.96 163 normal 0.63 0.90 0.75 21 accuracy 0.93 184 macro avg 0.81 0.92 0.85 184 weighted avg 0.95 0.93 0.93 184
139	0.6/0.4	414	44	SMOTEENN	224	75	163	21	no	0.9293478260869565	precision recall f1-score support cancer 0.99 0.99 0.99 224 normal 0.97 0.96 0.97 75 accuracy 0.98 299 macro avg 0.98 0.98 0.98 299 weighted avg 0.98 0.98 0.98 299	precision recall f1-score support cancer 0.99 0.93 0.96 163 normal 0.63 0.90 0.75 21 accuracy 0.93 184 macro avg 0.81 0.92 0.85 184 weighted avg 0.95 0.93 0.93 184
139	0.6/0.4	414	44	KMeansSMOTE	251	88	163	21	yes	0.9293478260869565	precision recall f1-score support cancer 0.98 0.94 0.96 251 normal 0.85 0.93 0.89 88 accuracy 0.94 339 macro avg 0.91 0.94 0.92 339 weighted avg 0.94 0.94 0.94 339	precision recall f1-score support cancer 0.98 0.94 0.96 163 normal 0.64 0.86 0.73 21 accuracy 0.93 184 macro avg 0.81 0.90 0.85 184 weighted avg 0.94 0.93 0.93 184
139	0.6/0.4	414	44	KMeansSMOTE	251	88	163	21	no	0.9293478260869565	precision recall f1-score support cancer 0.98 0.94 0.96 251 normal 0.85 0.93 0.89 88 accuracy 0.94 339 macro avg 0.91 0.94 0.92 339 weighted avg 0.94 0.94 0.94 339	precision recall f1-score support cancer 0.98 0.94 0.96 163 normal 0.64 0.86 0.73 21 accuracy 0.93 184 macro avg 0.81 0.90 0.85 184 weighted avg 0.94 0.93 0.93 184
13	0.7/0.3	414	44	No Balancing	293	27	121	17	yes	0.927536231884058	precision recall f1-score support cancer 0.99 0.90 0.94 293 normal 0.46 0.93 0.62 27 accuracy 0.90 320 macro avg 0.73 0.91 0.78 320 weighted avg 0.95 0.90 0.92 320	precision recall f1-score support cancer 0.98 0.93 0.96 121 normal 0.65 0.88 0.75 17 accuracy 0.93 138 macro avg 0.82 0.91 0.85 138 weighted avg 0.94 0.93 0.93 138
139	0.7/0.3	414	44	BorderlineSMOTE	293	96	121	17	yes	0.927536231884058	precision recall f1-score support cancer 0.99 0.88 0.94 293 normal 0.73 0.98 0.84 96 accuracy 0.91 389 macro avg 0.86 0.93 0.89 389 weighted avg 0.93 0.91 0.91 389	precision recall f1-score support cancer 0.98 0.93 0.96 121 normal 0.65 0.88 0.75 17 accuracy 0.93 138 macro avg 0.82 0.91 0.85 138 weighted avg 0.94 0.93 0.93 138
13	0.7/0.3	414	44	No Balancing	293	27	121	17	no	0.927536231884058	precision recall f1-score support cancer 0.99 0.90 0.94 293 normal 0.46 0.93 0.62 27 accuracy 0.90 320 macro avg 0.73 0.91 0.78 320 weighted avg 0.95 0.90 0.92 320	precision recall f1-score support cancer 0.98 0.93 0.96 121 normal 0.65 0.88 0.75 17 accuracy 0.93 138 macro avg 0.82 0.91 0.85 138 weighted avg 0.94 0.93 0.93 138
139	0.7/0.3	414	44	BorderlineSMOTE	293	96	121	17	no	0.927536231884058	precision recall f1-score support cancer 0.99 0.88 0.94 293 normal 0.73 0.98 0.84 96 accuracy 0.91 389 macro avg 0.86 0.93 0.89 389 weighted avg 0.93 0.91 0.91 389	precision recall f1-score support cancer 0.98 0.93 0.96 121 normal 0.65 0.88 0.75 17 accuracy 0.93 138 macro avg 0.82 0.91 0.85 138 weighted avg 0.94 0.93 0.93 138
13	0.8/0.2	414	44	SMOTEENN	305	89	81	11	no	0.9239130434782609	precision recall f1-score support cancer 0.99 0.94 0.96 305 normal 0.83 0.96 0.89 89 accuracy 0.95 394 macro avg 0.91 0.95 0.93 394 weighted avg 0.95 0.95 0.95 394	precision recall f1-score support cancer 0.97 0.94 0.96 81 normal 0.64 0.82 0.72 11 accuracy 0.92 92 macro avg 0.81 0.88 0.84 92 weighted avg 0.93 0.92 0.93 92
13	0.8/0.2	414	44	No Balancing	333	33	81	11	no	0.9239130434782609	precision recall f1-score support cancer 0.99 0.90 0.95 333 normal 0.49 0.94 0.65 33 accuracy 0.91 366 macro avg 0.74 0.92 0.80 366 weighted avg 0.95 0.91 0.92 366	precision recall f1-score support cancer 0.97 0.94 0.96 81 normal 0.64 0.82 0.72 11 accuracy 0.92 92 macro avg 0.81 0.88 0.84 92 weighted avg 0.93 0.92 0.93 92
13	0.8/0.2	414	44	KMeansSMOTE	333	116	81	11	yes	0.9239130434782609	precision recall f1-score support cancer 0.99 0.89 0.94 333 normal 0.77 0.98 0.86 116 accuracy 0.92 449 macro avg 0.88 0.94 0.90 449 weighted avg 0.93 0.92 0.92 449	precision recall f1-score support cancer 0.97 0.94 0.96 81 normal 0.64 0.82 0.72 11 accuracy 0.92 92 macro avg 0.81 0.88 0.84 92 weighted avg 0.93 0.92 0.93 92
13	0.8/0.2	414	44	SMOTEENN	305	89	81	11	yes	0.9239130434782609	precision recall f1-score support cancer 0.99 0.94 0.96 305 normal 0.83 0.96 0.89 89 accuracy 0.95 394 macro avg 0.91 0.95 0.93 394 weighted avg 0.95 0.95 0.95 394	precision recall f1-score support cancer 0.97 0.94 0.96 81 normal 0.64 0.82 0.72 11 accuracy 0.92 92 macro avg 0.81 0.88 0.84 92 weighted avg 0.93 0.92 0.93 92
13	0.8/0.2	414	44	No Balancing	333	33	81	11	yes	0.9239130434782609	precision recall f1-score support cancer 0.99 0.90 0.95 333 normal 0.49 0.94 0.65 33 accuracy 0.91 366 macro avg 0.74 0.92 0.80 366 weighted avg 0.95 0.91 0.92 366	precision recall f1-score support cancer 0.97 0.94 0.96 81 normal 0.64 0.82 0.72 11 accuracy 0.92 92 macro avg 0.81 0.88 0.84 92 weighted avg 0.93 0.92 0.93 92
139	0.8/0.2	414	44	No Balancing	333	33	81	11	yes	0.9239130434782609	precision recall f1-score support cancer 0.99 0.94 0.96 333 normal 0.60 0.88 0.72 33 accuracy 0.94 366 macro avg 0.80 0.91 0.84 366 weighted avg 0.95 0.94 0.94 366	precision recall f1-score support cancer 0.97 0.94 0.96 81 normal 0.64 0.82 0.72 11 accuracy 0.92 92 macro avg 0.81 0.88 0.84 92 weighted avg 0.93 0.92 0.93 92
13	0.8/0.2	414	44	KMeansSMOTE	333	116	81	11	no	0.9239130434782609	precision recall f1-score support cancer 0.99 0.89 0.94 333 normal 0.77 0.98 0.86 116 accuracy 0.92 449 macro avg 0.88 0.94 0.90 449 weighted avg 0.93 0.92 0.92 449	precision recall f1-score support cancer 0.97 0.94 0.96 81 normal 0.64 0.82 0.72 11 accuracy 0.92 92 macro avg 0.81 0.88 0.84 92 weighted avg 0.93 0.92 0.93 92
139	0.8/0.2	414	44	SMOTEENN	301	101	81	11	yes	0.9239130434782609	precision recall f1-score support cancer 0.99 0.99 0.99 301 normal 0.96 0.98 0.97 101 accuracy 0.99 402 macro avg 0.98 0.98 0.98 402 weighted avg 0.99 0.99 0.99 402	precision recall f1-score support cancer 0.97 0.94 0.96 81 normal 0.64 0.82 0.72 11 accuracy 0.92 92 macro avg 0.81 0.88 0.84 92 weighted avg 0.93 0.92 0.93 92
7	0.8/0.2	414	44	KMeansSMOTE	333	116	81	11	no	0.9239130434782609	precision recall f1-score support cancer 0.96 0.97 0.96 333 normal 0.90 0.87 0.89 116 accuracy 0.94 449 macro avg 0.93 0.92 0.92 449 weighted avg 0.94 0.94 0.94 449	precision recall f1-score support cancer 0.95 0.96 0.96 81 normal 0.70 0.64 0.67 11 accuracy 0.92 92 macro avg 0.83 0.80 0.81 92 weighted avg 0.92 0.92 0.92 92
139	0.8/0.2	414	44	No Balancing	333	33	81	11	no	0.9239130434782609	precision recall f1-score support cancer 0.99 0.94 0.96 333 normal 0.60 0.88 0.72 33 accuracy 0.94 366 macro avg 0.80 0.91 0.84 366 weighted avg 0.95 0.94 0.94 366	precision recall f1-score support cancer 0.97 0.94 0.96 81 normal 0.64 0.82 0.72 11 accuracy 0.92 92 macro avg 0.81 0.88 0.84 92 weighted avg 0.93 0.92 0.93 92
7	0.8/0.2	414	44	KMeansSMOTE	333	116	81	11	yes	0.9239130434782609	precision recall f1-score support cancer 0.96 0.97 0.96 333 normal 0.90 0.87 0.89 116 accuracy 0.94 449 macro avg 0.93 0.92 0.92 449 weighted avg 0.94 0.94 0.94 449	precision recall f1-score support cancer 0.95 0.96 0.96 81 normal 0.70 0.64 0.67 11 accuracy 0.92 92 macro avg 0.83 0.80 0.81 92 weighted avg 0.92 0.92 0.92 92
139	0.8/0.2	414	44	SMOTEENN	301	101	81	11	no	0.9239130434782609	precision recall f1-score support cancer 0.99 0.99 0.99 301 normal 0.96 0.98 0.97 101 accuracy 0.99 402 macro avg 0.98 0.98 0.98 402 weighted avg 0.99 0.99 0.99 402	precision recall f1-score support cancer 0.97 0.94 0.96 81 normal 0.64 0.82 0.72 11 accuracy 0.92 92 macro avg 0.81 0.88 0.84 92 weighted avg 0.93 0.92 0.93 92
7	0.7/0.3	414	44	KMeansSMOTE	293	103	121	17	yes	0.9202898550724637	precision recall f1-score support cancer 0.96 0.97 0.97 293 normal 0.92 0.88 0.90 103 accuracy 0.95 396 macro avg 0.94 0.93 0.93 396 weighted avg 0.95 0.95 0.95 396	precision recall f1-score support cancer 0.95 0.96 0.95 121 normal 0.69 0.65 0.67 17 accuracy 0.92 138 macro avg 0.82 0.80 0.81 138 weighted avg 0.92 0.92 0.92 138
7	0.7/0.3	414	44	KMeansSMOTE	293	103	121	17	no	0.9202898550724637	precision recall f1-score support cancer 0.96 0.97 0.97 293 normal 0.92 0.88 0.90 103 accuracy 0.95 396 macro avg 0.94 0.93 0.93 396 weighted avg 0.95 0.95 0.95 396	precision recall f1-score support cancer 0.95 0.96 0.95 121 normal 0.69 0.65 0.67 17 accuracy 0.92 138 macro avg 0.82 0.80 0.81 138 weighted avg 0.92 0.92 0.92 138
4	0.6/0.4	414	44	RandomOverSampler	251	87	163	21	no	0.9184782608695652	precision recall f1-score support cancer 0.91 0.96 0.93 251 normal 0.85 0.71 0.78 87 accuracy 0.89 338 macro avg 0.88 0.83 0.85 338 weighted avg 0.89 0.89 0.89 338	precision recall f1-score support cancer 0.95 0.96 0.95 163 normal 0.65 0.62 0.63 21 accuracy 0.92 184 macro avg 0.80 0.79 0.79 184 weighted avg 0.92 0.92 0.92 184
4	0.6/0.4	414	44	RandomOverSampler	251	87	163	21	yes	0.9184782608695652	precision recall f1-score support cancer 0.91 0.96 0.93 251 normal 0.85 0.71 0.78 87 accuracy 0.89 338 macro avg 0.88 0.83 0.85 338 weighted avg 0.89 0.89 0.89 338	precision recall f1-score support cancer 0.95 0.96 0.95 163 normal 0.65 0.62 0.63 21 accuracy 0.92 184 macro avg 0.80 0.79 0.79 184 weighted avg 0.92 0.92 0.92 184
7	0.6/0.4	414	44	No Balancing	251	23	163	21	yes	0.9130434782608695	precision recall f1-score support cancer 0.96 0.99 0.98 251 normal 0.87 0.57 0.68 23 accuracy 0.96 274 macro avg 0.91 0.78 0.83 274 weighted avg 0.95 0.96 0.95 274	precision recall f1-score support cancer 0.93 0.98 0.95 163 normal 0.69 0.43 0.53 21 accuracy 0.91 184 macro avg 0.81 0.70 0.74 184 weighted avg 0.90 0.91 0.90 184
139	0.7/0.3	414	44	KMeansSMOTE	293	102	121	17	no	0.9130434782608695	precision recall f1-score support cancer 0.96 1.00 0.98 293 normal 1.00 0.88 0.94 102 accuracy 0.97 395 macro avg 0.98 0.94 0.96 395 weighted avg 0.97 0.97 0.97 395	precision recall f1-score support cancer 0.92 0.99 0.95 121 normal 0.86 0.35 0.50 17 accuracy 0.91 138 macro avg 0.89 0.67 0.73 138 weighted avg 0.91 0.91 0.90 138
13	0.8/0.2	414	44	RandomOverSampler	333	116	81	11	no	0.9130434782608695	precision recall f1-score support cancer 0.99 0.87 0.93 333 normal 0.73 0.98 0.84 116 accuracy 0.90 449 macro avg 0.86 0.93 0.88 449 weighted avg 0.93 0.90 0.91 449	precision recall f1-score support cancer 0.97 0.93 0.95 81 normal 0.60 0.82 0.69 11 accuracy 0.91 92 macro avg 0.79 0.87 0.82 92 weighted avg 0.93 0.91 0.92 92
13	0.6/0.4	414	44	No Balancing	251	23	163	21	yes	0.9130434782608695	precision recall f1-score support cancer 0.99 0.90 0.95 251 normal 0.47 0.91 0.62 23 accuracy 0.91 274 macro avg 0.73 0.91 0.78 274 weighted avg 0.95 0.91 0.92 274	precision recall f1-score support cancer 0.99 0.91 0.95 163 normal 0.58 0.90 0.70 21 accuracy 0.91 184 macro avg 0.78 0.91 0.83 184 weighted avg 0.94 0.91 0.92 184
13	0.8/0.2	414	44	RandomOverSampler	333	116	81	11	yes	0.9130434782608695	precision recall f1-score support cancer 0.99 0.87 0.93 333 normal 0.73 0.98 0.84 116 accuracy 0.90 449 macro avg 0.86 0.93 0.88 449 weighted avg 0.93 0.90 0.91 449	precision recall f1-score support cancer 0.97 0.93 0.95 81 normal 0.60 0.82 0.69 11 accuracy 0.91 92 macro avg 0.79 0.87 0.82 92 weighted avg 0.93 0.91 0.92 92
139	0.7/0.3	414	44	KMeansSMOTE	293	102	121	17	yes	0.9130434782608695	precision recall f1-score support cancer 0.96 1.00 0.98 293 normal 1.00 0.88 0.94 102 accuracy 0.97 395 macro avg 0.98 0.94 0.96 395 weighted avg 0.97 0.97 0.97 395	precision recall f1-score support cancer 0.92 0.99 0.95 121 normal 0.86 0.35 0.50 17 accuracy 0.91 138 macro avg 0.89 0.67 0.73 138 weighted avg 0.91 0.91 0.90 138
7	0.6/0.4	414	44	No Balancing	251	23	163	21	no	0.9130434782608695	precision recall f1-score support cancer 0.96 0.99 0.98 251 normal 0.87 0.57 0.68 23 accuracy 0.96 274 macro avg 0.91 0.78 0.83 274 weighted avg 0.95 0.96 0.95 274	precision recall f1-score support cancer 0.93 0.98 0.95 163 normal 0.69 0.43 0.53 21 accuracy 0.91 184 macro avg 0.81 0.70 0.74 184 weighted avg 0.90 0.91 0.90 184
13	0.6/0.4	414	44	No Balancing	251	23	163	21	no	0.9130434782608695	precision recall f1-score support cancer 0.99 0.90 0.95 251 normal 0.47 0.91 0.62 23 accuracy 0.91 274 macro avg 0.73 0.91 0.78 274 weighted avg 0.95 0.91 0.92 274	precision recall f1-score support cancer 0.99 0.91 0.95 163 normal 0.58 0.90 0.70 21 accuracy 0.91 184 macro avg 0.78 0.91 0.83 184 weighted avg 0.94 0.91 0.92 184
4	0.6/0.4	414	44	KMeansSMOTE	251	87	163	21	no	0.907608695652174	precision recall f1-score support cancer 0.96 0.98 0.97 251 normal 0.93 0.89 0.91 87 accuracy 0.95 338 macro avg 0.94 0.93 0.94 338 weighted avg 0.95 0.95 0.95 338	precision recall f1-score support cancer 0.93 0.96 0.95 163 normal 0.62 0.48 0.54 21 accuracy 0.91 184 macro avg 0.78 0.72 0.74 184 weighted avg 0.90 0.91 0.90 184
139	0.6/0.4	414	44	BorderlineSMOTE	251	82	163	21	yes	0.907608695652174	precision recall f1-score support cancer 0.99 0.89 0.94 251 normal 0.75 0.98 0.85 82 accuracy 0.91 333 macro avg 0.87 0.93 0.89 333 weighted avg 0.93 0.91 0.92 333	precision recall f1-score support cancer 0.99 0.91 0.95 163 normal 0.56 0.90 0.69 21 accuracy 0.91 184 macro avg 0.77 0.91 0.82 184 weighted avg 0.94 0.91 0.92 184
139	0.6/0.4	414	44	BorderlineSMOTE	251	82	163	21	no	0.907608695652174	precision recall f1-score support cancer 0.99 0.89 0.94 251 normal 0.75 0.98 0.85 82 accuracy 0.91 333 macro avg 0.87 0.93 0.89 333 weighted avg 0.93 0.91 0.92 333	precision recall f1-score support cancer 0.99 0.91 0.95 163 normal 0.56 0.90 0.69 21 accuracy 0.91 184 macro avg 0.77 0.91 0.82 184 weighted avg 0.94 0.91 0.92 184
7	0.6/0.4	414	44	KMeansSMOTE	251	87	163	21	no	0.907608695652174	precision recall f1-score support cancer 0.96 0.98 0.97 251 normal 0.93 0.89 0.91 87 accuracy 0.95 338 macro avg 0.94 0.93 0.94 338 weighted avg 0.95 0.95 0.95 338	precision recall f1-score support cancer 0.95 0.94 0.95 163 normal 0.59 0.62 0.60 21 accuracy 0.91 184 macro avg 0.77 0.78 0.78 184 weighted avg 0.91 0.91 0.91 184
4	0.6/0.4	414	44	No Balancing	251	23	163	21	no	0.907608695652174	precision recall f1-score support cancer 0.96 0.97 0.96 251 normal 0.63 0.52 0.57 23 accuracy 0.93 274 macro avg 0.79 0.75 0.77 274 weighted avg 0.93 0.93 0.93 274	precision recall f1-score support cancer 0.93 0.96 0.95 163 normal 0.62 0.48 0.54 21 accuracy 0.91 184 macro avg 0.78 0.72 0.74 184 weighted avg 0.90 0.91 0.90 184
7	0.6/0.4	414	44	KMeansSMOTE	251	87	163	21	yes	0.907608695652174	precision recall f1-score support cancer 0.96 0.98 0.97 251 normal 0.93 0.89 0.91 87 accuracy 0.95 338 macro avg 0.94 0.93 0.94 338 weighted avg 0.95 0.95 0.95 338	precision recall f1-score support cancer 0.95 0.94 0.95 163 normal 0.59 0.62 0.60 21 accuracy 0.91 184 macro avg 0.77 0.78 0.78 184 weighted avg 0.91 0.91 0.91 184
13	0.6/0.4	414	44	KMeansSMOTE	251	87	163	21	no	0.907608695652174	precision recall f1-score support cancer 0.99 0.89 0.94 251 normal 0.75 0.98 0.85 87 accuracy 0.91 338 macro avg 0.87 0.93 0.89 338 weighted avg 0.93 0.91 0.91 338	precision recall f1-score support cancer 0.99 0.91 0.95 163 normal 0.56 0.90 0.69 21 accuracy 0.91 184 macro avg 0.77 0.91 0.82 184 weighted avg 0.94 0.91 0.92 184
13	0.6/0.4	414	44	KMeansSMOTE	251	87	163	21	yes	0.907608695652174	precision recall f1-score support cancer 0.99 0.89 0.94 251 normal 0.75 0.98 0.85 87 accuracy 0.91 338 macro avg 0.87 0.93 0.89 338 weighted avg 0.93 0.91 0.91 338	precision recall f1-score support cancer 0.99 0.91 0.95 163 normal 0.56 0.90 0.69 21 accuracy 0.91 184 macro avg 0.77 0.91 0.82 184 weighted avg 0.94 0.91 0.92 184
4	0.6/0.4	414	44	KMeansSMOTE	251	87	163	21	yes	0.907608695652174	precision recall f1-score support cancer 0.96 0.98 0.97 251 normal 0.93 0.89 0.91 87 accuracy 0.95 338 macro avg 0.94 0.93 0.94 338 weighted avg 0.95 0.95 0.95 338	precision recall f1-score support cancer 0.93 0.96 0.95 163 normal 0.62 0.48 0.54 21 accuracy 0.91 184 macro avg 0.78 0.72 0.74 184 weighted avg 0.90 0.91 0.90 184
4	0.6/0.4	414	44	No Balancing	251	23	163	21	yes	0.907608695652174	precision recall f1-score support cancer 0.96 0.97 0.96 251 normal 0.63 0.52 0.57 23 accuracy 0.93 274 macro avg 0.79 0.75 0.77 274 weighted avg 0.93 0.93 0.93 274	precision recall f1-score support cancer 0.93 0.96 0.95 163 normal 0.62 0.48 0.54 21 accuracy 0.91 184 macro avg 0.78 0.72 0.74 184 weighted avg 0.90 0.91 0.90 184
4	0.7/0.3	414	44	KMeansSMOTE	293	102	121	17	no	0.9057971014492754	precision recall f1-score support cancer 0.96 0.97 0.96 293 normal 0.91 0.88 0.90 102 accuracy 0.95 395 macro avg 0.93 0.93 0.93 395 weighted avg 0.95 0.95 0.95 395	precision recall f1-score support cancer 0.93 0.97 0.95 121 normal 0.67 0.47 0.55 17 accuracy 0.91 138 macro avg 0.80 0.72 0.75 138 weighted avg 0.90 0.91 0.90 138
13	0.7/0.3	414	44	RandomOverSampler	293	102	121	17	yes	0.9057971014492754	precision recall f1-score support cancer 0.99 0.86 0.92 293 normal 0.71 0.97 0.82 102 accuracy 0.89 395 macro avg 0.85 0.92 0.87 395 weighted avg 0.92 0.89 0.89 395	precision recall f1-score support cancer 0.98 0.91 0.94 121 normal 0.58 0.88 0.70 17 accuracy 0.91 138 macro avg 0.78 0.90 0.82 138 weighted avg 0.93 0.91 0.91 138
13	0.7/0.3	414	44	RandomOverSampler	293	102	121	17	no	0.9057971014492754	precision recall f1-score support cancer 0.99 0.86 0.92 293 normal 0.71 0.97 0.82 102 accuracy 0.89 395 macro avg 0.85 0.92 0.87 395 weighted avg 0.92 0.89 0.89 395	precision recall f1-score support cancer 0.98 0.91 0.94 121 normal 0.58 0.88 0.70 17 accuracy 0.91 138 macro avg 0.78 0.90 0.82 138 weighted avg 0.93 0.91 0.91 138
7	0.7/0.3	414	44	SMOTEENN	260	80	121	17	yes	0.9057971014492754	precision recall f1-score support cancer 0.95 0.98 0.96 260 normal 0.92 0.84 0.88 80 accuracy 0.94 340 macro avg 0.93 0.91 0.92 340 weighted avg 0.94 0.94 0.94 340	precision recall f1-score support cancer 0.96 0.93 0.95 121 normal 0.60 0.71 0.65 17 accuracy 0.91 138 macro avg 0.78 0.82 0.80 138 weighted avg 0.91 0.91 0.91 138
7	0.7/0.3	414	44	No Balancing	293	27	121	17	yes	0.9057971014492754	precision recall f1-score support cancer 0.96 0.99 0.97 293 normal 0.83 0.56 0.67 27 accuracy 0.95 320 macro avg 0.90 0.77 0.82 320 weighted avg 0.95 0.95 0.95 320	precision recall f1-score support cancer 0.92 0.98 0.95 121 normal 0.70 0.41 0.52 17 accuracy 0.91 138 macro avg 0.81 0.69 0.73 138 weighted avg 0.89 0.91 0.89 138
7	0.7/0.3	414	44	SMOTEENN	260	80	121	17	no	0.9057971014492754	precision recall f1-score support cancer 0.95 0.98 0.96 260 normal 0.92 0.84 0.88 80 accuracy 0.94 340 macro avg 0.93 0.91 0.92 340 weighted avg 0.94 0.94 0.94 340	precision recall f1-score support cancer 0.96 0.93 0.95 121 normal 0.60 0.71 0.65 17 accuracy 0.91 138 macro avg 0.78 0.82 0.80 138 weighted avg 0.91 0.91 0.91 138
7	0.7/0.3	414	44	No Balancing	293	27	121	17	no	0.9057971014492754	precision recall f1-score support cancer 0.96 0.99 0.97 293 normal 0.83 0.56 0.67 27 accuracy 0.95 320 macro avg 0.90 0.77 0.82 320 weighted avg 0.95 0.95 0.95 320	precision recall f1-score support cancer 0.92 0.98 0.95 121 normal 0.70 0.41 0.52 17 accuracy 0.91 138 macro avg 0.81 0.69 0.73 138 weighted avg 0.89 0.91 0.89 138
4	0.7/0.3	414	44	KMeansSMOTE	293	102	121	17	yes	0.9057971014492754	precision recall f1-score support cancer 0.96 0.97 0.96 293 normal 0.91 0.88 0.90 102 accuracy 0.95 395 macro avg 0.93 0.93 0.93 395 weighted avg 0.95 0.95 0.95 395	precision recall f1-score support cancer 0.93 0.97 0.95 121 normal 0.67 0.47 0.55 17 accuracy 0.91 138 macro avg 0.80 0.72 0.75 138 weighted avg 0.90 0.91 0.90 138
4	0.6/0.4	414	44	BorderlineSMOTE	251	82	163	21	no	0.9021739130434783	precision recall f1-score support cancer 0.93 0.94 0.94 251 normal 0.81 0.79 0.80 82 accuracy 0.90 333 macro avg 0.87 0.87 0.87 333 weighted avg 0.90 0.90 0.90 333	precision recall f1-score support cancer 0.96 0.93 0.94 163 normal 0.56 0.71 0.62 21 accuracy 0.90 184 macro avg 0.76 0.82 0.78 184 weighted avg 0.92 0.90 0.91 184
7	0.6/0.4	414	44	RandomOverSampler	251	87	163	21	no	0.9021739130434783	precision recall f1-score support cancer 0.90 0.96 0.93 251 normal 0.87 0.69 0.77 87 accuracy 0.89 338 macro avg 0.88 0.83 0.85 338 weighted avg 0.89 0.89 0.89 338	precision recall f1-score support cancer 0.96 0.93 0.94 163 normal 0.56 0.67 0.61 21 accuracy 0.90 184 macro avg 0.76 0.80 0.78 184 weighted avg 0.91 0.90 0.91 184
7	0.8/0.2	414	44	No Balancing	333	33	81	11	no	0.9021739130434783	precision recall f1-score support cancer 0.95 0.99 0.97 333 normal 0.81 0.52 0.63 33 accuracy 0.95 366 macro avg 0.88 0.75 0.80 366 weighted avg 0.94 0.95 0.94 366	precision recall f1-score support cancer 0.93 0.96 0.95 81 normal 0.62 0.45 0.53 11 accuracy 0.90 92 macro avg 0.78 0.71 0.74 92 weighted avg 0.89 0.90 0.90 92
7	0.8/0.2	414	44	RandomOverSampler	333	116	81	11	no	0.9021739130434783	precision recall f1-score support cancer 0.90 0.93 0.92 333 normal 0.79 0.72 0.75 116 accuracy 0.88 449 macro avg 0.85 0.82 0.83 449 weighted avg 0.87 0.88 0.88 449	precision recall f1-score support cancer 0.96 0.93 0.94 81 normal 0.57 0.73 0.64 11 accuracy 0.90 92 macro avg 0.77 0.83 0.79 92 weighted avg 0.91 0.90 0.91 92
139	0.8/0.2	414	44	BorderlineSMOTE	333	109	81	11	no	0.9021739130434783	precision recall f1-score support cancer 0.99 0.89 0.94 333 normal 0.75 0.97 0.84 109 accuracy 0.91 442 macro avg 0.87 0.93 0.89 442 weighted avg 0.93 0.91 0.92 442	precision recall f1-score support cancer 0.97 0.91 0.94 81 normal 0.56 0.82 0.67 11 accuracy 0.90 92 macro avg 0.77 0.87 0.80 92 weighted avg 0.92 0.90 0.91 92
4	0.8/0.2	414	44	No Balancing	333	33	81	11	yes	0.9021739130434783	precision recall f1-score support cancer 0.95 0.97 0.96 333 normal 0.63 0.52 0.57 33 accuracy 0.93 366 macro avg 0.79 0.74 0.76 366 weighted avg 0.92 0.93 0.93 366	precision recall f1-score support cancer 0.95 0.94 0.94 81 normal 0.58 0.64 0.61 11 accuracy 0.90 92 macro avg 0.77 0.79 0.78 92 weighted avg 0.91 0.90 0.90 92
4	0.8/0.2	414	44	No Balancing	333	33	81	11	no	0.9021739130434783	precision recall f1-score support cancer 0.95 0.97 0.96 333 normal 0.63 0.52 0.57 33 accuracy 0.93 366 macro avg 0.79 0.74 0.76 366 weighted avg 0.92 0.93 0.93 366	precision recall f1-score support cancer 0.95 0.94 0.94 81 normal 0.58 0.64 0.61 11 accuracy 0.90 92 macro avg 0.77 0.79 0.78 92 weighted avg 0.91 0.90 0.90 92
4	0.6/0.4	414	44	BorderlineSMOTE	251	82	163	21	yes	0.9021739130434783	precision recall f1-score support cancer 0.93 0.94 0.94 251 normal 0.81 0.79 0.80 82 accuracy 0.90 333 macro avg 0.87 0.87 0.87 333 weighted avg 0.90 0.90 0.90 333	precision recall f1-score support cancer 0.96 0.93 0.94 163 normal 0.56 0.71 0.62 21 accuracy 0.90 184 macro avg 0.76 0.82 0.78 184 weighted avg 0.92 0.90 0.91 184
7	0.6/0.4	414	44	RandomOverSampler	251	87	163	21	yes	0.9021739130434783	precision recall f1-score support cancer 0.90 0.96 0.93 251 normal 0.87 0.69 0.77 87 accuracy 0.89 338 macro avg 0.88 0.83 0.85 338 weighted avg 0.89 0.89 0.89 338	precision recall f1-score support cancer 0.96 0.93 0.94 163 normal 0.56 0.67 0.61 21 accuracy 0.90 184 macro avg 0.76 0.80 0.78 184 weighted avg 0.91 0.90 0.91 184
7	0.8/0.2	414	44	RandomOverSampler	333	116	81	11	yes	0.9021739130434783	precision recall f1-score support cancer 0.90 0.93 0.92 333 normal 0.79 0.72 0.75 116 accuracy 0.88 449 macro avg 0.85 0.82 0.83 449 weighted avg 0.87 0.88 0.88 449	precision recall f1-score support cancer 0.96 0.93 0.94 81 normal 0.57 0.73 0.64 11 accuracy 0.90 92 macro avg 0.77 0.83 0.79 92 weighted avg 0.91 0.90 0.91 92
7	0.8/0.2	414	44	No Balancing	333	33	81	11	yes	0.9021739130434783	precision recall f1-score support cancer 0.95 0.99 0.97 333 normal 0.81 0.52 0.63 33 accuracy 0.95 366 macro avg 0.88 0.75 0.80 366 weighted avg 0.94 0.95 0.94 366	precision recall f1-score support cancer 0.93 0.96 0.95 81 normal 0.62 0.45 0.53 11 accuracy 0.90 92 macro avg 0.78 0.71 0.74 92 weighted avg 0.89 0.90 0.90 92
139	0.8/0.2	414	44	BorderlineSMOTE	333	109	81	11	yes	0.9021739130434783	precision recall f1-score support cancer 0.99 0.89 0.94 333 normal 0.75 0.97 0.84 109 accuracy 0.91 442 macro avg 0.87 0.93 0.89 442 weighted avg 0.93 0.91 0.92 442	precision recall f1-score support cancer 0.97 0.91 0.94 81 normal 0.56 0.82 0.67 11 accuracy 0.90 92 macro avg 0.77 0.87 0.80 92 weighted avg 0.92 0.90 0.91 92
13	0.7/0.3	414	44	SMOTEENN	266	78	121	17	yes	0.8985507246376812	precision recall f1-score support cancer 1.00 0.93 0.96 266 normal 0.81 1.00 0.90 78 accuracy 0.95 344 macro avg 0.91 0.97 0.93 344 weighted avg 0.96 0.95 0.95 344	precision recall f1-score support cancer 0.98 0.90 0.94 121 normal 0.56 0.88 0.68 17 accuracy 0.90 138 macro avg 0.77 0.89 0.81 138 weighted avg 0.93 0.90 0.91 138
13	0.7/0.3	414	44	SMOTEENN	266	78	121	17	no	0.8985507246376812	precision recall f1-score support cancer 1.00 0.93 0.96 266 normal 0.81 1.00 0.90 78 accuracy 0.95 344 macro avg 0.91 0.97 0.93 344 weighted avg 0.96 0.95 0.95 344	precision recall f1-score support cancer 0.98 0.90 0.94 121 normal 0.56 0.88 0.68 17 accuracy 0.90 138 macro avg 0.77 0.89 0.81 138 weighted avg 0.93 0.90 0.91 138
4	0.6/0.4	414	44	SMOTEENN	222	56	163	21	yes	0.8967391304347826	precision recall f1-score support cancer 0.96 0.99 0.97 222 normal 0.96 0.82 0.88 56 accuracy 0.96 278 macro avg 0.96 0.91 0.93 278 weighted avg 0.96 0.96 0.96 278	precision recall f1-score support cancer 0.96 0.92 0.94 163 normal 0.54 0.71 0.61 21 accuracy 0.90 184 macro avg 0.75 0.82 0.78 184 weighted avg 0.91 0.90 0.90 184
4	0.6/0.4	414	44	SMOTEENN	222	56	163	21	no	0.8967391304347826	precision recall f1-score support cancer 0.96 0.99 0.97 222 normal 0.96 0.82 0.88 56 accuracy 0.96 278 macro avg 0.96 0.91 0.93 278 weighted avg 0.96 0.96 0.96 278	precision recall f1-score support cancer 0.96 0.92 0.94 163 normal 0.54 0.71 0.61 21 accuracy 0.90 184 macro avg 0.75 0.82 0.78 184 weighted avg 0.91 0.90 0.90 184
4	0.8/0.2	414	44	KMeansSMOTE	333	116	81	11	no	0.8913043478260869	precision recall f1-score support cancer 0.95 0.98 0.96 333 normal 0.93 0.86 0.89 116 accuracy 0.95 449 macro avg 0.94 0.92 0.93 449 weighted avg 0.95 0.95 0.95 449	precision recall f1-score support cancer 0.94 0.94 0.94 81 normal 0.55 0.55 0.55 11 accuracy 0.89 92 macro avg 0.74 0.74 0.74 92 weighted avg 0.89 0.89 0.89 92
7	0.8/0.2	414	44	SMOTEENN	293	93	81	11	yes	0.8913043478260869	precision recall f1-score support cancer 0.96 0.97 0.96 293 normal 0.91 0.86 0.88 93 accuracy 0.95 386 macro avg 0.93 0.92 0.92 386 weighted avg 0.94 0.95 0.95 386	precision recall f1-score support cancer 0.96 0.91 0.94 81 normal 0.53 0.73 0.62 11 accuracy 0.89 92 macro avg 0.75 0.82 0.78 92 weighted avg 0.91 0.89 0.90 92
13	0.8/0.2	414	44	BorderlineSMOTE	333	109	81	11	no	0.8913043478260869	precision recall f1-score support cancer 1.00 0.84 0.91 333 normal 0.67 0.99 0.80 109 accuracy 0.88 442 macro avg 0.83 0.92 0.86 442 weighted avg 0.92 0.88 0.88 442	precision recall f1-score support cancer 0.99 0.89 0.94 81 normal 0.53 0.91 0.67 11 accuracy 0.89 92 macro avg 0.76 0.90 0.80 92 weighted avg 0.93 0.89 0.90 92
13	0.8/0.2	414	44	BorderlineSMOTE	333	109	81	11	yes	0.8913043478260869	precision recall f1-score support cancer 1.00 0.84 0.91 333 normal 0.67 0.99 0.80 109 accuracy 0.88 442 macro avg 0.83 0.92 0.86 442 weighted avg 0.92 0.88 0.88 442	precision recall f1-score support cancer 0.99 0.89 0.94 81 normal 0.53 0.91 0.67 11 accuracy 0.89 92 macro avg 0.76 0.90 0.80 92 weighted avg 0.93 0.89 0.90 92
13	0.7/0.3	414	44	BorderlineSMOTE	293	96	121	17	yes	0.8913043478260869	precision recall f1-score support cancer 1.00 0.84 0.91 293 normal 0.66 0.99 0.79 96 accuracy 0.87 389 macro avg 0.83 0.91 0.85 389 weighted avg 0.91 0.87 0.88 389	precision recall f1-score support cancer 0.98 0.89 0.94 121 normal 0.54 0.88 0.67 17 accuracy 0.89 138 macro avg 0.76 0.89 0.80 138 weighted avg 0.93 0.89 0.90 138
13	0.7/0.3	414	44	BorderlineSMOTE	293	96	121	17	no	0.8913043478260869	precision recall f1-score support cancer 1.00 0.84 0.91 293 normal 0.66 0.99 0.79 96 accuracy 0.87 389 macro avg 0.83 0.91 0.85 389 weighted avg 0.91 0.87 0.88 389	precision recall f1-score support cancer 0.98 0.89 0.94 121 normal 0.54 0.88 0.67 17 accuracy 0.89 138 macro avg 0.76 0.89 0.80 138 weighted avg 0.93 0.89 0.90 138
7	0.7/0.3	414	44	RandomOverSampler	293	102	121	17	yes	0.8913043478260869	precision recall f1-score support cancer 0.88 0.93 0.91 293 normal 0.77 0.65 0.70 102 accuracy 0.86 395 macro avg 0.83 0.79 0.80 395 weighted avg 0.85 0.86 0.85 395	precision recall f1-score support cancer 0.96 0.92 0.94 121 normal 0.55 0.71 0.62 17 accuracy 0.89 138 macro avg 0.75 0.81 0.78 138 weighted avg 0.91 0.89 0.90 138
4	0.7/0.3	414	44	RandomOverSampler	293	102	121	17	no	0.8913043478260869	precision recall f1-score support cancer 0.87 0.95 0.91 293 normal 0.80 0.59 0.68 102 accuracy 0.86 395 macro avg 0.83 0.77 0.79 395 weighted avg 0.85 0.86 0.85 395	precision recall f1-score support cancer 0.95 0.93 0.94 121 normal 0.55 0.65 0.59 17 accuracy 0.89 138 macro avg 0.75 0.79 0.77 138 weighted avg 0.90 0.89 0.90 138
7	0.8/0.2	414	44	SMOTEENN	293	93	81	11	no	0.8913043478260869	precision recall f1-score support cancer 0.96 0.97 0.96 293 normal 0.91 0.86 0.88 93 accuracy 0.95 386 macro avg 0.93 0.92 0.92 386 weighted avg 0.94 0.95 0.95 386	precision recall f1-score support cancer 0.96 0.91 0.94 81 normal 0.53 0.73 0.62 11 accuracy 0.89 92 macro avg 0.75 0.82 0.78 92 weighted avg 0.91 0.89 0.90 92
4	0.8/0.2	414	44	KMeansSMOTE	333	116	81	11	yes	0.8913043478260869	precision recall f1-score support cancer 0.95 0.98 0.96 333 normal 0.93 0.86 0.89 116 accuracy 0.95 449 macro avg 0.94 0.92 0.93 449 weighted avg 0.95 0.95 0.95 449	precision recall f1-score support cancer 0.94 0.94 0.94 81 normal 0.55 0.55 0.55 11 accuracy 0.89 92 macro avg 0.74 0.74 0.74 92 weighted avg 0.89 0.89 0.89 92
7	0.7/0.3	414	44	RandomOverSampler	293	102	121	17	no	0.8913043478260869	precision recall f1-score support cancer 0.88 0.93 0.91 293 normal 0.77 0.65 0.70 102 accuracy 0.86 395 macro avg 0.83 0.79 0.80 395 weighted avg 0.85 0.86 0.85 395	precision recall f1-score support cancer 0.96 0.92 0.94 121 normal 0.55 0.71 0.62 17 accuracy 0.89 138 macro avg 0.75 0.81 0.78 138 weighted avg 0.91 0.89 0.90 138
4	0.7/0.3	414	44	SMOTEENN	257	54	121	17	yes	0.8913043478260869	precision recall f1-score support cancer 0.96 0.99 0.98 257 normal 0.94 0.81 0.87 54 accuracy 0.96 311 macro avg 0.95 0.90 0.92 311 weighted avg 0.96 0.96 0.96 311	precision recall f1-score support cancer 0.95 0.93 0.94 121 normal 0.55 0.65 0.59 17 accuracy 0.89 138 macro avg 0.75 0.79 0.77 138 weighted avg 0.90 0.89 0.90 138
4	0.7/0.3	414	44	RandomOverSampler	293	102	121	17	yes	0.8913043478260869	precision recall f1-score support cancer 0.87 0.95 0.91 293 normal 0.80 0.59 0.68 102 accuracy 0.86 395 macro avg 0.83 0.77 0.79 395 weighted avg 0.85 0.86 0.85 395	precision recall f1-score support cancer 0.95 0.93 0.94 121 normal 0.55 0.65 0.59 17 accuracy 0.89 138 macro avg 0.75 0.79 0.77 138 weighted avg 0.90 0.89 0.90 138
4	0.7/0.3	414	44	SMOTEENN	257	54	121	17	no	0.8913043478260869	precision recall f1-score support cancer 0.96 0.99 0.98 257 normal 0.94 0.81 0.87 54 accuracy 0.96 311 macro avg 0.95 0.90 0.92 311 weighted avg 0.96 0.96 0.96 311	precision recall f1-score support cancer 0.95 0.93 0.94 121 normal 0.55 0.65 0.59 17 accuracy 0.89 138 macro avg 0.75 0.79 0.77 138 weighted avg 0.90 0.89 0.90 138
4	0.7/0.3	414	44	No Balancing	293	27	121	17	yes	0.8840579710144928	precision recall f1-score support cancer 0.94 0.99 0.97 293 normal 0.82 0.33 0.47 27 accuracy 0.94 320 macro avg 0.88 0.66 0.72 320 weighted avg 0.93 0.94 0.93 320	precision recall f1-score support cancer 0.90 0.98 0.94 121 normal 0.57 0.24 0.33 17 accuracy 0.88 138 macro avg 0.74 0.61 0.63 138 weighted avg 0.86 0.88 0.86 138
4	0.7/0.3	414	44	BorderlineSMOTE	293	96	121	17	yes	0.8840579710144928	precision recall f1-score support cancer 0.94 0.93 0.93 293 normal 0.79 0.81 0.80 96 accuracy 0.90 389 macro avg 0.86 0.87 0.87 389 weighted avg 0.90 0.90 0.90 389	precision recall f1-score support cancer 0.96 0.91 0.93 121 normal 0.52 0.71 0.60 17 accuracy 0.88 138 macro avg 0.74 0.81 0.77 138 weighted avg 0.90 0.88 0.89 138
4	0.7/0.3	414	44	BorderlineSMOTE	293	96	121	17	no	0.8840579710144928	precision recall f1-score support cancer 0.94 0.93 0.93 293 normal 0.79 0.81 0.80 96 accuracy 0.90 389 macro avg 0.86 0.87 0.87 389 weighted avg 0.90 0.90 0.90 389	precision recall f1-score support cancer 0.96 0.91 0.93 121 normal 0.52 0.71 0.60 17 accuracy 0.88 138 macro avg 0.74 0.81 0.77 138 weighted avg 0.90 0.88 0.89 138
4	0.7/0.3	414	44	No Balancing	293	27	121	17	no	0.8840579710144928	precision recall f1-score support cancer 0.94 0.99 0.97 293 normal 0.82 0.33 0.47 27 accuracy 0.94 320 macro avg 0.88 0.66 0.72 320 weighted avg 0.93 0.94 0.93 320	precision recall f1-score support cancer 0.90 0.98 0.94 121 normal 0.57 0.24 0.33 17 accuracy 0.88 138 macro avg 0.74 0.61 0.63 138 weighted avg 0.86 0.88 0.86 138
139	0.8/0.2	414	44	KMeansSMOTE	333	116	81	11	no	0.8804347826086957	precision recall f1-score support cancer 0.94 1.00 0.97 333 normal 1.00 0.80 0.89 116 accuracy 0.95 449 macro avg 0.97 0.90 0.93 449 weighted avg 0.95 0.95 0.95 449	precision recall f1-score support cancer 0.89 0.99 0.94 81 normal 0.50 0.09 0.15 11 accuracy 0.88 92 macro avg 0.69 0.54 0.54 92 weighted avg 0.84 0.88 0.84 92
139	0.8/0.2	414	44	KMeansSMOTE	333	116	81	11	yes	0.8804347826086957	precision recall f1-score support cancer 0.94 1.00 0.97 333 normal 1.00 0.80 0.89 116 accuracy 0.95 449 macro avg 0.97 0.90 0.93 449 weighted avg 0.95 0.95 0.95 449	precision recall f1-score support cancer 0.89 0.99 0.94 81 normal 0.50 0.09 0.15 11 accuracy 0.88 92 macro avg 0.69 0.54 0.54 92 weighted avg 0.84 0.88 0.84 92
7	0.7/0.3	414	44	BorderlineSMOTE	293	96	121	17	yes	0.8768115942028986	precision recall f1-score support cancer 0.99 0.93 0.96 293 normal 0.82 0.96 0.88 96 accuracy 0.94 389 macro avg 0.90 0.95 0.92 389 weighted avg 0.95 0.94 0.94 389	precision recall f1-score support cancer 0.96 0.89 0.93 121 normal 0.50 0.76 0.60 17 accuracy 0.88 138 macro avg 0.73 0.83 0.77 138 weighted avg 0.91 0.88 0.89 138
7	0.7/0.3	414	44	BorderlineSMOTE	293	96	121	17	no	0.8768115942028986	precision recall f1-score support cancer 0.99 0.93 0.96 293 normal 0.82 0.96 0.88 96 accuracy 0.94 389 macro avg 0.90 0.95 0.92 389 weighted avg 0.95 0.94 0.94 389	precision recall f1-score support cancer 0.96 0.89 0.93 121 normal 0.50 0.76 0.60 17 accuracy 0.88 138 macro avg 0.73 0.83 0.77 138 weighted avg 0.91 0.88 0.89 138
13	0.6/0.4	414	44	RandomOverSampler	251	87	163	21	yes	0.875	precision recall f1-score support cancer 0.99 0.86 0.92 251 normal 0.70 0.98 0.82 87 accuracy 0.89 338 macro avg 0.85 0.92 0.87 338 weighted avg 0.92 0.89 0.89 338	precision recall f1-score support cancer 0.99 0.87 0.93 163 normal 0.47 0.90 0.62 21 accuracy 0.88 184 macro avg 0.73 0.89 0.77 184 weighted avg 0.93 0.88 0.89 184
7	0.6/0.4	414	44	BorderlineSMOTE	251	82	163	21	yes	0.875	precision recall f1-score support cancer 0.98 0.94 0.96 251 normal 0.85 0.95 0.90 82 accuracy 0.95 333 macro avg 0.92 0.95 0.93 333 weighted avg 0.95 0.95 0.95 333	precision recall f1-score support cancer 0.96 0.90 0.93 163 normal 0.47 0.71 0.57 21 accuracy 0.88 184 macro avg 0.71 0.80 0.75 184 weighted avg 0.90 0.88 0.89 184
13	0.6/0.4	414	44	SMOTEENN	225	71	163	21	yes	0.875	precision recall f1-score support cancer 1.00 0.89 0.94 225 normal 0.74 1.00 0.85 71 accuracy 0.92 296 macro avg 0.87 0.94 0.90 296 weighted avg 0.94 0.92 0.92 296	precision recall f1-score support cancer 0.99 0.87 0.93 163 normal 0.47 0.90 0.62 21 accuracy 0.88 184 macro avg 0.73 0.89 0.77 184 weighted avg 0.93 0.88 0.89 184
13	0.6/0.4	414	44	SMOTEENN	225	71	163	21	no	0.875	precision recall f1-score support cancer 1.00 0.89 0.94 225 normal 0.74 1.00 0.85 71 accuracy 0.92 296 macro avg 0.87 0.94 0.90 296 weighted avg 0.94 0.92 0.92 296	precision recall f1-score support cancer 0.99 0.87 0.93 163 normal 0.47 0.90 0.62 21 accuracy 0.88 184 macro avg 0.73 0.89 0.77 184 weighted avg 0.93 0.88 0.89 184
13	0.6/0.4	414	44	RandomOverSampler	251	87	163	21	no	0.875	precision recall f1-score support cancer 0.99 0.86 0.92 251 normal 0.70 0.98 0.82 87 accuracy 0.89 338 macro avg 0.85 0.92 0.87 338 weighted avg 0.92 0.89 0.89 338	precision recall f1-score support cancer 0.99 0.87 0.93 163 normal 0.47 0.90 0.62 21 accuracy 0.88 184 macro avg 0.73 0.89 0.77 184 weighted avg 0.93 0.88 0.89 184
7	0.6/0.4	414	44	BorderlineSMOTE	251	82	163	21	no	0.875	precision recall f1-score support cancer 0.98 0.94 0.96 251 normal 0.85 0.95 0.90 82 accuracy 0.95 333 macro avg 0.92 0.95 0.93 333 weighted avg 0.95 0.95 0.95 333	precision recall f1-score support cancer 0.96 0.90 0.93 163 normal 0.47 0.71 0.57 21 accuracy 0.88 184 macro avg 0.71 0.80 0.75 184 weighted avg 0.90 0.88 0.89 184
4	0.8/0.2	414	44	RandomOverSampler	333	116	81	11	yes	0.8695652173913043	precision recall f1-score support cancer 0.89 0.93 0.91 333 normal 0.78 0.67 0.72 116 accuracy 0.87 449 macro avg 0.84 0.80 0.82 449 weighted avg 0.86 0.87 0.86 449	precision recall f1-score support cancer 0.96 0.89 0.92 81 normal 0.47 0.73 0.57 11 accuracy 0.87 92 macro avg 0.72 0.81 0.75 92 weighted avg 0.90 0.87 0.88 92
4	0.8/0.2	414	44	RandomOverSampler	333	116	81	11	no	0.8695652173913043	precision recall f1-score support cancer 0.89 0.93 0.91 333 normal 0.78 0.67 0.72 116 accuracy 0.87 449 macro avg 0.84 0.80 0.82 449 weighted avg 0.86 0.87 0.86 449	precision recall f1-score support cancer 0.96 0.89 0.92 81 normal 0.47 0.73 0.57 11 accuracy 0.87 92 macro avg 0.72 0.81 0.75 92 weighted avg 0.90 0.87 0.88 92
4	0.8/0.2	414	44	SMOTEENN	290	71	81	11	no	0.8695652173913043	precision recall f1-score support cancer 0.97 1.00 0.98 290 normal 0.98 0.87 0.93 71 accuracy 0.97 361 macro avg 0.98 0.93 0.95 361 weighted avg 0.97 0.97 0.97 361	precision recall f1-score support cancer 0.96 0.89 0.92 81 normal 0.47 0.73 0.57 11 accuracy 0.87 92 macro avg 0.72 0.81 0.75 92 weighted avg 0.90 0.87 0.88 92
4	0.8/0.2	414	44	SMOTEENN	290	71	81	11	yes	0.8695652173913043	precision recall f1-score support cancer 0.97 1.00 0.98 290 normal 0.98 0.87 0.93 71 accuracy 0.97 361 macro avg 0.98 0.93 0.95 361 weighted avg 0.97 0.97 0.97 361	precision recall f1-score support cancer 0.96 0.89 0.92 81 normal 0.47 0.73 0.57 11 accuracy 0.87 92 macro avg 0.72 0.81 0.75 92 weighted avg 0.90 0.87 0.88 92
7	0.6/0.4	414	44	SMOTEENN	221	71	163	21	no	0.8641304347826086	precision recall f1-score support cancer 0.95 0.98 0.96 221 normal 0.94 0.83 0.88 71 accuracy 0.95 292 macro avg 0.94 0.91 0.92 292 weighted avg 0.94 0.95 0.94 292	precision recall f1-score support cancer 0.96 0.88 0.92 163 normal 0.44 0.71 0.55 21 accuracy 0.86 184 macro avg 0.70 0.80 0.73 184 weighted avg 0.90 0.86 0.88 184
7	0.6/0.4	414	44	SMOTEENN	221	71	163	21	yes	0.8641304347826086	precision recall f1-score support cancer 0.95 0.98 0.96 221 normal 0.94 0.83 0.88 71 accuracy 0.95 292 macro avg 0.94 0.91 0.92 292 weighted avg 0.94 0.95 0.94 292	precision recall f1-score support cancer 0.96 0.88 0.92 163 normal 0.44 0.71 0.55 21 accuracy 0.86 184 macro avg 0.70 0.80 0.73 184 weighted avg 0.90 0.86 0.88 184
7	0.8/0.2	414	44	BorderlineSMOTE	333	109	81	11	yes	0.8586956521739131	precision recall f1-score support cancer 0.99 0.92 0.95 333 normal 0.79 0.96 0.87 109 accuracy 0.93 442 macro avg 0.89 0.94 0.91 442 weighted avg 0.94 0.93 0.93 442	precision recall f1-score support cancer 0.96 0.88 0.92 81 normal 0.44 0.73 0.55 11 accuracy 0.86 92 macro avg 0.70 0.80 0.73 92 weighted avg 0.90 0.86 0.87 92
7	0.8/0.2	414	44	BorderlineSMOTE	333	109	81	11	no	0.8586956521739131	precision recall f1-score support cancer 0.99 0.92 0.95 333 normal 0.79 0.96 0.87 109 accuracy 0.93 442 macro avg 0.89 0.94 0.91 442 weighted avg 0.94 0.93 0.93 442	precision recall f1-score support cancer 0.96 0.88 0.92 81 normal 0.44 0.73 0.55 11 accuracy 0.86 92 macro avg 0.70 0.80 0.73 92 weighted avg 0.90 0.86 0.87 92
4	0.8/0.2	414	44	BorderlineSMOTE	333	109	81	11	no	0.8586956521739131	precision recall f1-score support cancer 0.95 0.94 0.94 333 normal 0.82 0.83 0.83 109 accuracy 0.91 442 macro avg 0.88 0.89 0.89 442 weighted avg 0.91 0.91 0.91 442	precision recall f1-score support cancer 0.96 0.88 0.92 81 normal 0.44 0.73 0.55 11 accuracy 0.86 92 macro avg 0.70 0.80 0.73 92 weighted avg 0.90 0.86 0.87 92
4	0.8/0.2	414	44	BorderlineSMOTE	333	109	81	11	yes	0.8586956521739131	precision recall f1-score support cancer 0.95 0.94 0.94 333 normal 0.82 0.83 0.83 109 accuracy 0.91 442 macro avg 0.88 0.89 0.89 442 weighted avg 0.91 0.91 0.91 442	precision recall f1-score support cancer 0.96 0.88 0.92 81 normal 0.44 0.73 0.55 11 accuracy 0.86 92 macro avg 0.70 0.80 0.73 92 weighted avg 0.90 0.86 0.87 92
13	0.6/0.4	414	44	BorderlineSMOTE	251	82	163	21	no	0.842391304347826	precision recall f1-score support cancer 1.00 0.83 0.90 251 normal 0.65 0.99 0.79 82 accuracy 0.87 333 macro avg 0.82 0.91 0.85 333 weighted avg 0.91 0.87 0.88 333	precision recall f1-score support cancer 0.99 0.83 0.90 163 normal 0.42 0.95 0.58 21 accuracy 0.84 184 macro avg 0.70 0.89 0.74 184 weighted avg 0.93 0.84 0.87 184
13	0.6/0.4	414	44	BorderlineSMOTE	251	82	163	21	yes	0.842391304347826	precision recall f1-score support cancer 1.00 0.83 0.90 251 normal 0.65 0.99 0.79 82 accuracy 0.87 333 macro avg 0.82 0.91 0.85 333 weighted avg 0.91 0.87 0.88 333	precision recall f1-score support cancer 0.99 0.83 0.90 163 normal 0.42 0.95 0.58 21 accuracy 0.84 184 macro avg 0.70 0.89 0.74 184 weighted avg 0.93 0.84 0.87 184

## Sheet: Final Results
Jumlah Gene,Split_Ratio,Initial_No_of_cancer,Initial_No_of_normal,Before_Splitting,No. of cancer in Train,No. of normal in Train,No. of cancer in Test,No. of normal in Test,Hyperparameter,Test_Accuracy,Train_Classification_Report,Classification_Report
139,0.7/0.3,414,44,No Balancing,293,27,121,17,no,0.9492753623188406," precision recall f1-score support
cancer 0.98 0.96 0.97 293
normal 0.63 0.81 0.71 27
accuracy 0.94 320
macro avg 0.81 0.89 0.84 320
weighted avg 0.95 0.94 0.95 320
, precision recall f1-score support
cancer 0.97 0.98 0.97 121
normal 0.81 0.76 0.79 17
accuracy 0.95 138
macro avg 0.89 0.87 0.88 138
weighted avg 0.95 0.95 0.95 138
_x000D_ 13,0.7/0.3,414,44,KMeansSMOTE,293,102,121,17,yes,0.9492753623188406, precision recall f1-score support
cancer 0.99 0.92 0.95 293
normal 0.81 0.97 0.88 102
accuracy 0.93 395
macro avg 0.90 0.95 0.92 395
weighted avg 0.94 0.93 0.94 395
, precision recall f1-score support
cancer 0.97 0.97 0.97 121
normal 0.78 0.82 0.80 17
accuracy 0.95 138
macro avg 0.88 0.90 0.89 138
weighted avg 0.95 0.95 0.95 138
_x000D_ 13,0.7/0.3,414,44,KMeansSMOTE,293,102,121,17,no,0.9492753623188406, precision recall f1-score support
cancer 0.99 0.92 0.95 293
normal 0.81 0.97 0.88 102
accuracy 0.93 395
macro avg 0.90 0.95 0.92 395
weighted avg 0.94 0.93 0.94 395
, precision recall f1-score support
cancer 0.97 0.97 0.97 121
normal 0.78 0.82 0.80 17
accuracy 0.95 138
macro avg 0.88 0.90 0.89 138
weighted avg 0.95 0.95 0.95 138
_x000D_ 139,0.7/0.3,414,44,No Balancing,293,27,121,17,yes,0.9492753623188406, precision recall f1-score support
cancer 0.98 0.96 0.97 293
normal 0.63 0.81 0.71 27
accuracy 0.94 320
macro avg 0.81 0.89 0.84 320
weighted avg 0.95 0.94 0.95 320
, precision recall f1-score support
cancer 0.97 0.98 0.97 121
normal 0.81 0.76 0.79 17
accuracy 0.95 138
macro avg 0.89 0.87 0.88 138
weighted avg 0.95 0.95 0.95 138
_x000D_ 139,0.6/0.4,414,44,No Balancing,251,23,163,21,no,0.9456521739130435, precision recall f1-score support
cancer 0.98 0.96 0.97 251
normal 0.65 0.74 0.69 23
accuracy 0.95 274
macro avg 0.81 0.85 0.83 274
weighted avg 0.95 0.95 0.95 274
, precision recall f1-score support
cancer 0.98 0.96 0.97 163
normal 0.74 0.81 0.77 21
accuracy 0.95 184
macro avg 0.86 0.89 0.87 184
weighted avg 0.95 0.95 0.95 184
_x000D_ 139,0.6/0.4,414,44,No Balancing,251,23,163,21,yes,0.9456521739130435, precision recall f1-score support
cancer 0.98 0.96 0.97 251
normal 0.65 0.74 0.69 23
accuracy 0.95 274
macro avg 0.81 0.85 0.83 274
weighted avg 0.95 0.95 0.95 274
, precision recall f1-score support
cancer 0.98 0.96 0.97 163
normal 0.74 0.81 0.77 21
accuracy 0.95 184
macro avg 0.86 0.89 0.87 184
weighted avg 0.95 0.95 0.95 184
_x000D_ 139,0.7/0.3,414,44,RandomOverSampler,293,102,121,17,yes,0.9420289855072463, precision recall f1-score support
cancer 0.94 0.93 0.94 293
normal 0.80 0.84 0.82 102
accuracy 0.91 395
macro avg 0.87 0.89 0.88 395
weighted avg 0.91 0.91 0.91 395
, precision recall f1-score support
cancer 0.98 0.95 0.97 121
normal 0.71 0.88 0.79 17
accuracy 0.94 138
macro avg 0.85 0.92 0.88 138
weighted avg 0.95 0.94 0.94 138
_x000D_ 139,0.7/0.3,414,44,RandomOverSampler,293,102,121,17,no,0.9420289855072463, precision recall f1-score support
cancer 0.94 0.93 0.94 293
normal 0.80 0.84 0.82 102
accuracy 0.91 395
macro avg 0.87 0.89 0.88 395
weighted avg 0.91 0.91 0.91 395
, precision recall f1-score support
cancer 0.98 0.95 0.97 121
normal 0.71 0.88 0.79 17
accuracy 0.94 138
macro avg 0.85 0.92 0.88 138
weighted avg 0.95 0.94 0.94 138
_x000D_ 139,0.6/0.4,414,44,RandomOverSampler,251,87,163,21,no,0.9402173913043478, precision recall f1-score support
cancer 0.96 0.96 0.96 251
normal 0.87 0.87 0.87 87
accuracy 0.93 338
macro avg 0.91 0.91 0.91 338
weighted avg 0.93 0.93 0.93 338
, precision recall f1-score support
cancer 0.99 0.94 0.97 163
normal 0.68 0.90 0.78 21
accuracy 0.94 184
macro avg 0.83 0.92 0.87 184
weighted avg 0.95 0.94 0.94 184
_x000D_ 139,0.6/0.4,414,44,RandomOverSampler,251,87,163,21,yes,0.9402173913043478, precision recall f1-score support
cancer 0.96 0.96 0.96 251
normal 0.87 0.87 0.87 87
accuracy 0.93 338
macro avg 0.91 0.91 0.91 338
weighted avg 0.93 0.93 0.93 338
, precision recall f1-score support
cancer 0.99 0.94 0.97 163
normal 0.68 0.90 0.78 21
accuracy 0.94 184
macro avg 0.83 0.92 0.87 184
weighted avg 0.95 0.94 0.94 184
_x000D_ 139,0.8/0.2,414,44,RandomOverSampler,333,116,81,11,no,0.9347826086956522, precision recall f1-score support
cancer 0.97 0.95 0.96 333
normal 0.87 0.91 0.89 116
accuracy 0.94 449
macro avg 0.92 0.93 0.92 449
weighted avg 0.94 0.94 0.94 449
, precision recall f1-score support
cancer 0.96 0.96 0.96 81
normal 0.73 0.73 0.73 11
accuracy 0.93 92
macro avg 0.85 0.85 0.85 92
weighted avg 0.93 0.93 0.93 92
_x000D_ 139,0.7/0.3,414,44,SMOTEENN,267,89,121,17,no,0.9347826086956522, precision recall f1-score support
cancer 0.98 1.00 0.99 267
normal 0.99 0.94 0.97 89
accuracy 0.98 356
macro avg 0.98 0.97 0.98 356
weighted avg 0.98 0.98 0.98 356
, precision recall f1-score support
cancer 0.98 0.94 0.96 121
normal 0.68 0.88 0.77 17
accuracy 0.93 138
macro avg 0.83 0.91 0.87 138
weighted avg 0.95 0.93 0.94 138
_x000D_ 139,0.8/0.2,414,44,RandomOverSampler,333,116,81,11,yes,0.9347826086956522, precision recall f1-score support
cancer 0.97 0.95 0.96 333
normal 0.87 0.91 0.89 116
accuracy 0.94 449
macro avg 0.92 0.93 0.92 449
weighted avg 0.94 0.94 0.94 449
, precision recall f1-score support
cancer 0.96 0.96 0.96 81
normal 0.73 0.73 0.73 11
accuracy 0.93 92
macro avg 0.85 0.85 0.85 92
weighted avg 0.93 0.93 0.93 92
_x000D_ 139,0.7/0.3,414,44,SMOTEENN,267,89,121,17,yes,0.9347826086956522, precision recall f1-score support
cancer 0.98 1.00 0.99 267
normal 0.99 0.94 0.97 89
accuracy 0.98 356
macro avg 0.98 0.97 0.98 356
weighted avg 0.98 0.98 0.98 356
, precision recall f1-score support
cancer 0.98 0.94 0.96 121
normal 0.68 0.88 0.77 17
accuracy 0.93 138
macro avg 0.83 0.91 0.87 138
weighted avg 0.95 0.93 0.94 138
_x000D_ 139,0.6/0.4,414,44,SMOTEENN,224,75,163,21,yes,0.9293478260869565, precision recall f1-score support
cancer 0.99 0.99 0.99 224
normal 0.97 0.96 0.97 75
accuracy 0.98 299
macro avg 0.98 0.98 0.98 299
weighted avg 0.98 0.98 0.98 299
, precision recall f1-score support
cancer 0.99 0.93 0.96 163
normal 0.63 0.90 0.75 21
accuracy 0.93 184
macro avg 0.81 0.92 0.85 184
weighted avg 0.95 0.93 0.93 184
_x000D_ 139,0.6/0.4,414,44,SMOTEENN,224,75,163,21,no,0.9293478260869565, precision recall f1-score support
cancer 0.99 0.99 0.99 224
normal 0.97 0.96 0.97 75
accuracy 0.98 299
macro avg 0.98 0.98 0.98 299
weighted avg 0.98 0.98 0.98 299
, precision recall f1-score support
cancer 0.99 0.93 0.96 163
normal 0.63 0.90 0.75 21
accuracy 0.93 184
macro avg 0.81 0.92 0.85 184
weighted avg 0.95 0.93 0.93 184
_x000D_ 139,0.6/0.4,414,44,KMeansSMOTE,251,88,163,21,yes,0.9293478260869565, precision recall f1-score support
cancer 0.98 0.94 0.96 251
normal 0.85 0.93 0.89 88
accuracy 0.94 339
macro avg 0.91 0.94 0.92 339
weighted avg 0.94 0.94 0.94 339
, precision recall f1-score support
cancer 0.98 0.94 0.96 163
normal 0.64 0.86 0.73 21
accuracy 0.93 184
macro avg 0.81 0.90 0.85 184
weighted avg 0.94 0.93 0.93 184
_x000D_ 139,0.6/0.4,414,44,KMeansSMOTE,251,88,163,21,no,0.9293478260869565, precision recall f1-score support
cancer 0.98 0.94 0.96 251
normal 0.85 0.93 0.89 88
accuracy 0.94 339
macro avg 0.91 0.94 0.92 339
weighted avg 0.94 0.94 0.94 339
, precision recall f1-score support
cancer 0.98 0.94 0.96 163
normal 0.64 0.86 0.73 21
accuracy 0.93 184
macro avg 0.81 0.90 0.85 184
weighted avg 0.94 0.93 0.93 184
_x000D_ 13,0.7/0.3,414,44,No Balancing,293,27,121,17,yes,0.927536231884058, precision recall f1-score support
cancer 0.99 0.90 0.94 293
normal 0.46 0.93 0.62 27
accuracy 0.90 320
macro avg 0.73 0.91 0.78 320
weighted avg 0.95 0.90 0.92 320
, precision recall f1-score support
cancer 0.98 0.93 0.96 121
normal 0.65 0.88 0.75 17
accuracy 0.93 138
macro avg 0.82 0.91 0.85 138
weighted avg 0.94 0.93 0.93 138
_x000D_ 139,0.7/0.3,414,44,BorderlineSMOTE,293,96,121,17,yes,0.927536231884058, precision recall f1-score support
cancer 0.99 0.88 0.94 293
normal 0.73 0.98 0.84 96
accuracy 0.91 389
macro avg 0.86 0.93 0.89 389
weighted avg 0.93 0.91 0.91 389
, precision recall f1-score support
cancer 0.98 0.93 0.96 121
normal 0.65 0.88 0.75 17
accuracy 0.93 138
macro avg 0.82 0.91 0.85 138
weighted avg 0.94 0.93 0.93 138
_x000D_ 13,0.7/0.3,414,44,No Balancing,293,27,121,17,no,0.927536231884058, precision recall f1-score support
cancer 0.99 0.90 0.94 293
normal 0.46 0.93 0.62 27
accuracy 0.90 320
macro avg 0.73 0.91 0.78 320
weighted avg 0.95 0.90 0.92 320
, precision recall f1-score support
cancer 0.98 0.93 0.96 121
normal 0.65 0.88 0.75 17
accuracy 0.93 138
macro avg 0.82 0.91 0.85 138
weighted avg 0.94 0.93 0.93 138
_x000D_ 139,0.7/0.3,414,44,BorderlineSMOTE,293,96,121,17,no,0.927536231884058, precision recall f1-score support
cancer 0.99 0.88 0.94 293
normal 0.73 0.98 0.84 96
accuracy 0.91 389
macro avg 0.86 0.93 0.89 389
weighted avg 0.93 0.91 0.91 389
, precision recall f1-score support
cancer 0.98 0.93 0.96 121
normal 0.65 0.88 0.75 17
accuracy 0.93 138
macro avg 0.82 0.91 0.85 138
weighted avg 0.94 0.93 0.93 138
_x000D_ 13,0.8/0.2,414,44,SMOTEENN,305,89,81,11,no,0.9239130434782609, precision recall f1-score support
cancer 0.99 0.94 0.96 305
normal 0.83 0.96 0.89 89
accuracy 0.95 394
macro avg 0.91 0.95 0.93 394
weighted avg 0.95 0.95 0.95 394
, precision recall f1-score support
cancer 0.97 0.94 0.96 81
normal 0.64 0.82 0.72 11
accuracy 0.92 92
macro avg 0.81 0.88 0.84 92
weighted avg 0.93 0.92 0.93 92
_x000D_ 13,0.8/0.2,414,44,No Balancing,333,33,81,11,no,0.9239130434782609, precision recall f1-score support
cancer 0.99 0.90 0.95 333
normal 0.49 0.94 0.65 33
accuracy 0.91 366
macro avg 0.74 0.92 0.80 366
weighted avg 0.95 0.91 0.92 366
, precision recall f1-score support
cancer 0.97 0.94 0.96 81
normal 0.64 0.82 0.72 11
accuracy 0.92 92
macro avg 0.81 0.88 0.84 92
weighted avg 0.93 0.92 0.93 92
_x000D_ 13,0.8/0.2,414,44,KMeansSMOTE,333,116,81,11,yes,0.9239130434782609, precision recall f1-score support
cancer 0.99 0.89 0.94 333
normal 0.77 0.98 0.86 116
accuracy 0.92 449
macro avg 0.88 0.94 0.90 449
weighted avg 0.93 0.92 0.92 449
, precision recall f1-score support
cancer 0.97 0.94 0.96 81
normal 0.64 0.82 0.72 11
accuracy 0.92 92
macro avg 0.81 0.88 0.84 92
weighted avg 0.93 0.92 0.93 92
_x000D_ 13,0.8/0.2,414,44,SMOTEENN,305,89,81,11,yes,0.9239130434782609, precision recall f1-score support
cancer 0.99 0.94 0.96 305
normal 0.83 0.96 0.89 89
accuracy 0.95 394
macro avg 0.91 0.95 0.93 394
weighted avg 0.95 0.95 0.95 394
, precision recall f1-score support
cancer 0.97 0.94 0.96 81
normal 0.64 0.82 0.72 11
accuracy 0.92 92
macro avg 0.81 0.88 0.84 92
weighted avg 0.93 0.92 0.93 92
_x000D_ 13,0.8/0.2,414,44,No Balancing,333,33,81,11,yes,0.9239130434782609, precision recall f1-score support
cancer 0.99 0.90 0.95 333
normal 0.49 0.94 0.65 33
accuracy 0.91 366
macro avg 0.74 0.92 0.80 366
weighted avg 0.95 0.91 0.92 366
, precision recall f1-score support
cancer 0.97 0.94 0.96 81
normal 0.64 0.82 0.72 11
accuracy 0.92 92
macro avg 0.81 0.88 0.84 92
weighted avg 0.93 0.92 0.93 92
_x000D_ 139,0.8/0.2,414,44,No Balancing,333,33,81,11,yes,0.9239130434782609, precision recall f1-score support
cancer 0.99 0.94 0.96 333
normal 0.60 0.88 0.72 33
accuracy 0.94 366
macro avg 0.80 0.91 0.84 366
weighted avg 0.95 0.94 0.94 366
, precision recall f1-score support
cancer 0.97 0.94 0.96 81
normal 0.64 0.82 0.72 11
accuracy 0.92 92
macro avg 0.81 0.88 0.84 92
weighted avg 0.93 0.92 0.93 92
_x000D_ 13,0.8/0.2,414,44,KMeansSMOTE,333,116,81,11,no,0.9239130434782609, precision recall f1-score support
cancer 0.99 0.89 0.94 333
normal 0.77 0.98 0.86 116
accuracy 0.92 449
macro avg 0.88 0.94 0.90 449
weighted avg 0.93 0.92 0.92 449
, precision recall f1-score support
cancer 0.97 0.94 0.96 81
normal 0.64 0.82 0.72 11
accuracy 0.92 92
macro avg 0.81 0.88 0.84 92
weighted avg 0.93 0.92 0.93 92
_x000D_ 139,0.8/0.2,414,44,SMOTEENN,301,101,81,11,yes,0.9239130434782609, precision recall f1-score support
cancer 0.99 0.99 0.99 301
normal 0.96 0.98 0.97 101
accuracy 0.99 402
macro avg 0.98 0.98 0.98 402
weighted avg 0.99 0.99 0.99 402
, precision recall f1-score support
cancer 0.97 0.94 0.96 81
normal 0.64 0.82 0.72 11
accuracy 0.92 92
macro avg 0.81 0.88 0.84 92
weighted avg 0.93 0.92 0.93 92
_x000D_ 7,0.8/0.2,414,44,KMeansSMOTE,333,116,81,11,no,0.9239130434782609, precision recall f1-score support
cancer 0.96 0.97 0.96 333
normal 0.90 0.87 0.89 116
accuracy 0.94 449
macro avg 0.93 0.92 0.92 449
weighted avg 0.94 0.94 0.94 449
, precision recall f1-score support
cancer 0.95 0.96 0.96 81
normal 0.70 0.64 0.67 11
accuracy 0.92 92
macro avg 0.83 0.80 0.81 92
weighted avg 0.92 0.92 0.92 92
_x000D_ 139,0.8/0.2,414,44,No Balancing,333,33,81,11,no,0.9239130434782609, precision recall f1-score support
cancer 0.99 0.94 0.96 333
normal 0.60 0.88 0.72 33
accuracy 0.94 366
macro avg 0.80 0.91 0.84 366
weighted avg 0.95 0.94 0.94 366
, precision recall f1-score support
cancer 0.97 0.94 0.96 81
normal 0.64 0.82 0.72 11
accuracy 0.92 92
macro avg 0.81 0.88 0.84 92
weighted avg 0.93 0.92 0.93 92
_x000D_ 7,0.8/0.2,414,44,KMeansSMOTE,333,116,81,11,yes,0.9239130434782609, precision recall f1-score support
cancer 0.96 0.97 0.96 333
normal 0.90 0.87 0.89 116
accuracy 0.94 449
macro avg 0.93 0.92 0.92 449
weighted avg 0.94 0.94 0.94 449
, precision recall f1-score support
cancer 0.95 0.96 0.96 81
normal 0.70 0.64 0.67 11
accuracy 0.92 92
macro avg 0.83 0.80 0.81 92
weighted avg 0.92 0.92 0.92 92
_x000D_ 139,0.8/0.2,414,44,SMOTEENN,301,101,81,11,no,0.9239130434782609, precision recall f1-score support
cancer 0.99 0.99 0.99 301
normal 0.96 0.98 0.97 101
accuracy 0.99 402
macro avg 0.98 0.98 0.98 402
weighted avg 0.99 0.99 0.99 402
, precision recall f1-score support
cancer 0.97 0.94 0.96 81
normal 0.64 0.82 0.72 11
accuracy 0.92 92
macro avg 0.81 0.88 0.84 92
weighted avg 0.93 0.92 0.93 92
_x000D_ 7,0.7/0.3,414,44,KMeansSMOTE,293,103,121,17,yes,0.9202898550724637, precision recall f1-score support
cancer 0.96 0.97 0.97 293
normal 0.92 0.88 0.90 103
accuracy 0.95 396
macro avg 0.94 0.93 0.93 396
weighted avg 0.95 0.95 0.95 396
, precision recall f1-score support
cancer 0.95 0.96 0.95 121
normal 0.69 0.65 0.67 17
accuracy 0.92 138
macro avg 0.82 0.80 0.81 138
weighted avg 0.92 0.92 0.92 138
_x000D_ 7,0.7/0.3,414,44,KMeansSMOTE,293,103,121,17,no,0.9202898550724637, precision recall f1-score support
cancer 0.96 0.97 0.97 293
normal 0.92 0.88 0.90 103
accuracy 0.95 396
macro avg 0.94 0.93 0.93 396
weighted avg 0.95 0.95 0.95 396
, precision recall f1-score support
cancer 0.95 0.96 0.95 121
normal 0.69 0.65 0.67 17
accuracy 0.92 138
macro avg 0.82 0.80 0.81 138
weighted avg 0.92 0.92 0.92 138
_x000D_ 4,0.6/0.4,414,44,RandomOverSampler,251,87,163,21,no,0.9184782608695652, precision recall f1-score support
cancer 0.91 0.96 0.93 251
normal 0.85 0.71 0.78 87
accuracy 0.89 338
macro avg 0.88 0.83 0.85 338
weighted avg 0.89 0.89 0.89 338
, precision recall f1-score support
cancer 0.95 0.96 0.95 163
normal 0.65 0.62 0.63 21
accuracy 0.92 184
macro avg 0.80 0.79 0.79 184
weighted avg 0.92 0.92 0.92 184
_x000D_ 4,0.6/0.4,414,44,RandomOverSampler,251,87,163,21,yes,0.9184782608695652, precision recall f1-score support
cancer 0.91 0.96 0.93 251
normal 0.85 0.71 0.78 87
accuracy 0.89 338
macro avg 0.88 0.83 0.85 338
weighted avg 0.89 0.89 0.89 338
, precision recall f1-score support
cancer 0.95 0.96 0.95 163
normal 0.65 0.62 0.63 21
accuracy 0.92 184
macro avg 0.80 0.79 0.79 184
weighted avg 0.92 0.92 0.92 184
_x000D_ 7,0.6/0.4,414,44,No Balancing,251,23,163,21,yes,0.9130434782608695, precision recall f1-score support
cancer 0.96 0.99 0.98 251
normal 0.87 0.57 0.68 23
accuracy 0.96 274
macro avg 0.91 0.78 0.83 274
weighted avg 0.95 0.96 0.95 274
, precision recall f1-score support
cancer 0.93 0.98 0.95 163
normal 0.69 0.43 0.53 21
accuracy 0.91 184
macro avg 0.81 0.70 0.74 184
weighted avg 0.90 0.91 0.90 184
_x000D_ 139,0.7/0.3,414,44,KMeansSMOTE,293,102,121,17,no,0.9130434782608695, precision recall f1-score support
cancer 0.96 1.00 0.98 293
normal 1.00 0.88 0.94 102
accuracy 0.97 395
macro avg 0.98 0.94 0.96 395
weighted avg 0.97 0.97 0.97 395
, precision recall f1-score support
cancer 0.92 0.99 0.95 121
normal 0.86 0.35 0.50 17
accuracy 0.91 138
macro avg 0.89 0.67 0.73 138
weighted avg 0.91 0.91 0.90 138
_x000D_ 13,0.8/0.2,414,44,RandomOverSampler,333,116,81,11,no,0.9130434782608695, precision recall f1-score support
cancer 0.99 0.87 0.93 333
normal 0.73 0.98 0.84 116
accuracy 0.90 449
macro avg 0.86 0.93 0.88 449
weighted avg 0.93 0.90 0.91 449
, precision recall f1-score support
cancer 0.97 0.93 0.95 81
normal 0.60 0.82 0.69 11
accuracy 0.91 92
macro avg 0.79 0.87 0.82 92
weighted avg 0.93 0.91 0.92 92
_x000D_ 13,0.6/0.4,414,44,No Balancing,251,23,163,21,yes,0.9130434782608695, precision recall f1-score support
cancer 0.99 0.90 0.95 251
normal 0.47 0.91 0.62 23
accuracy 0.91 274
macro avg 0.73 0.91 0.78 274
weighted avg 0.95 0.91 0.92 274
, precision recall f1-score support
cancer 0.99 0.91 0.95 163
normal 0.58 0.90 0.70 21
accuracy 0.91 184
macro avg 0.78 0.91 0.83 184
weighted avg 0.94 0.91 0.92 184
_x000D_ 13,0.8/0.2,414,44,RandomOverSampler,333,116,81,11,yes,0.9130434782608695, precision recall f1-score support
cancer 0.99 0.87 0.93 333
normal 0.73 0.98 0.84 116
accuracy 0.90 449
macro avg 0.86 0.93 0.88 449
weighted avg 0.93 0.90 0.91 449
, precision recall f1-score support
cancer 0.97 0.93 0.95 81
normal 0.60 0.82 0.69 11
accuracy 0.91 92
macro avg 0.79 0.87 0.82 92
weighted avg 0.93 0.91 0.92 92
_x000D_ 139,0.7/0.3,414,44,KMeansSMOTE,293,102,121,17,yes,0.9130434782608695, precision recall f1-score support
cancer 0.96 1.00 0.98 293
normal 1.00 0.88 0.94 102
accuracy 0.97 395
macro avg 0.98 0.94 0.96 395
weighted avg 0.97 0.97 0.97 395
, precision recall f1-score support
cancer 0.92 0.99 0.95 121
normal 0.86 0.35 0.50 17
accuracy 0.91 138
macro avg 0.89 0.67 0.73 138
weighted avg 0.91 0.91 0.90 138
_x000D_ 7,0.6/0.4,414,44,No Balancing,251,23,163,21,no,0.9130434782608695, precision recall f1-score support
cancer 0.96 0.99 0.98 251
normal 0.87 0.57 0.68 23
accuracy 0.96 274
macro avg 0.91 0.78 0.83 274
weighted avg 0.95 0.96 0.95 274
, precision recall f1-score support
cancer 0.93 0.98 0.95 163
normal 0.69 0.43 0.53 21
accuracy 0.91 184
macro avg 0.81 0.70 0.74 184
weighted avg 0.90 0.91 0.90 184
_x000D_ 13,0.6/0.4,414,44,No Balancing,251,23,163,21,no,0.9130434782608695, precision recall f1-score support
cancer 0.99 0.90 0.95 251
normal 0.47 0.91 0.62 23
accuracy 0.91 274
macro avg 0.73 0.91 0.78 274
weighted avg 0.95 0.91 0.92 274
, precision recall f1-score support
cancer 0.99 0.91 0.95 163
normal 0.58 0.90 0.70 21
accuracy 0.91 184
macro avg 0.78 0.91 0.83 184
weighted avg 0.94 0.91 0.92 184
_x000D_ 4,0.6/0.4,414,44,KMeansSMOTE,251,87,163,21,no,0.907608695652174, precision recall f1-score support
cancer 0.96 0.98 0.97 251
normal 0.93 0.89 0.91 87
accuracy 0.95 338
macro avg 0.94 0.93 0.94 338
weighted avg 0.95 0.95 0.95 338
, precision recall f1-score support
cancer 0.93 0.96 0.95 163
normal 0.62 0.48 0.54 21
accuracy 0.91 184
macro avg 0.78 0.72 0.74 184
weighted avg 0.90 0.91 0.90 184
_x000D_ 139,0.6/0.4,414,44,BorderlineSMOTE,251,82,163,21,yes,0.907608695652174, precision recall f1-score support
cancer 0.99 0.89 0.94 251
normal 0.75 0.98 0.85 82
accuracy 0.91 333
macro avg 0.87 0.93 0.89 333
weighted avg 0.93 0.91 0.92 333
, precision recall f1-score support
cancer 0.99 0.91 0.95 163
normal 0.56 0.90 0.69 21
accuracy 0.91 184
macro avg 0.77 0.91 0.82 184
weighted avg 0.94 0.91 0.92 184
_x000D_ 139,0.6/0.4,414,44,BorderlineSMOTE,251,82,163,21,no,0.907608695652174, precision recall f1-score support
cancer 0.99 0.89 0.94 251
normal 0.75 0.98 0.85 82
accuracy 0.91 333
macro avg 0.87 0.93 0.89 333
weighted avg 0.93 0.91 0.92 333
, precision recall f1-score support
cancer 0.99 0.91 0.95 163
normal 0.56 0.90 0.69 21
accuracy 0.91 184
macro avg 0.77 0.91 0.82 184
weighted avg 0.94 0.91 0.92 184
_x000D_ 7,0.6/0.4,414,44,KMeansSMOTE,251,87,163,21,no,0.907608695652174, precision recall f1-score support
cancer 0.96 0.98 0.97 251
normal 0.93 0.89 0.91 87
accuracy 0.95 338
macro avg 0.94 0.93 0.94 338
weighted avg 0.95 0.95 0.95 338
, precision recall f1-score support
cancer 0.95 0.94 0.95 163
normal 0.59 0.62 0.60 21
accuracy 0.91 184
macro avg 0.77 0.78 0.78 184
weighted avg 0.91 0.91 0.91 184
_x000D_ 4,0.6/0.4,414,44,No Balancing,251,23,163,21,no,0.907608695652174, precision recall f1-score support
cancer 0.96 0.97 0.96 251
normal 0.63 0.52 0.57 23
accuracy 0.93 274
macro avg 0.79 0.75 0.77 274
weighted avg 0.93 0.93 0.93 274
, precision recall f1-score support
cancer 0.93 0.96 0.95 163
normal 0.62 0.48 0.54 21
accuracy 0.91 184
macro avg 0.78 0.72 0.74 184
weighted avg 0.90 0.91 0.90 184
_x000D_ 7,0.6/0.4,414,44,KMeansSMOTE,251,87,163,21,yes,0.907608695652174, precision recall f1-score support
cancer 0.96 0.98 0.97 251
normal 0.93 0.89 0.91 87
accuracy 0.95 338
macro avg 0.94 0.93 0.94 338
weighted avg 0.95 0.95 0.95 338
, precision recall f1-score support
cancer 0.95 0.94 0.95 163
normal 0.59 0.62 0.60 21
accuracy 0.91 184
macro avg 0.77 0.78 0.78 184
weighted avg 0.91 0.91 0.91 184
_x000D_ 13,0.6/0.4,414,44,KMeansSMOTE,251,87,163,21,no,0.907608695652174, precision recall f1-score support
cancer 0.99 0.89 0.94 251
normal 0.75 0.98 0.85 87
accuracy 0.91 338
macro avg 0.87 0.93 0.89 338
weighted avg 0.93 0.91 0.91 338
, precision recall f1-score support
cancer 0.99 0.91 0.95 163
normal 0.56 0.90 0.69 21
accuracy 0.91 184
macro avg 0.77 0.91 0.82 184
weighted avg 0.94 0.91 0.92 184
_x000D_ 13,0.6/0.4,414,44,KMeansSMOTE,251,87,163,21,yes,0.907608695652174, precision recall f1-score support
cancer 0.99 0.89 0.94 251
normal 0.75 0.98 0.85 87
accuracy 0.91 338
macro avg 0.87 0.93 0.89 338
weighted avg 0.93 0.91 0.91 338
, precision recall f1-score support
cancer 0.99 0.91 0.95 163
normal 0.56 0.90 0.69 21
accuracy 0.91 184
macro avg 0.77 0.91 0.82 184
weighted avg 0.94 0.91 0.92 184
_x000D_ 4,0.6/0.4,414,44,KMeansSMOTE,251,87,163,21,yes,0.907608695652174, precision recall f1-score support
cancer 0.96 0.98 0.97 251
normal 0.93 0.89 0.91 87
accuracy 0.95 338
macro avg 0.94 0.93 0.94 338
weighted avg 0.95 0.95 0.95 338
, precision recall f1-score support
cancer 0.93 0.96 0.95 163
normal 0.62 0.48 0.54 21
accuracy 0.91 184
macro avg 0.78 0.72 0.74 184
weighted avg 0.90 0.91 0.90 184
_x000D_ 4,0.6/0.4,414,44,No Balancing,251,23,163,21,yes,0.907608695652174, precision recall f1-score support
cancer 0.96 0.97 0.96 251
normal 0.63 0.52 0.57 23
accuracy 0.93 274
macro avg 0.79 0.75 0.77 274
weighted avg 0.93 0.93 0.93 274
, precision recall f1-score support
cancer 0.93 0.96 0.95 163
normal 0.62 0.48 0.54 21
accuracy 0.91 184
macro avg 0.78 0.72 0.74 184
weighted avg 0.90 0.91 0.90 184
_x000D_ 4,0.7/0.3,414,44,KMeansSMOTE,293,102,121,17,no,0.9057971014492754, precision recall f1-score support
cancer 0.96 0.97 0.96 293
normal 0.91 0.88 0.90 102
accuracy 0.95 395
macro avg 0.93 0.93 0.93 395
weighted avg 0.95 0.95 0.95 395
, precision recall f1-score support
cancer 0.93 0.97 0.95 121
normal 0.67 0.47 0.55 17
accuracy 0.91 138
macro avg 0.80 0.72 0.75 138
weighted avg 0.90 0.91 0.90 138
_x000D_ 13,0.7/0.3,414,44,RandomOverSampler,293,102,121,17,yes,0.9057971014492754, precision recall f1-score support
cancer 0.99 0.86 0.92 293
normal 0.71 0.97 0.82 102
accuracy 0.89 395
macro avg 0.85 0.92 0.87 395
weighted avg 0.92 0.89 0.89 395
, precision recall f1-score support
cancer 0.98 0.91 0.94 121
normal 0.58 0.88 0.70 17
accuracy 0.91 138
macro avg 0.78 0.90 0.82 138
weighted avg 0.93 0.91 0.91 138
_x000D_ 13,0.7/0.3,414,44,RandomOverSampler,293,102,121,17,no,0.9057971014492754, precision recall f1-score support
cancer 0.99 0.86 0.92 293
normal 0.71 0.97 0.82 102
accuracy 0.89 395
macro avg 0.85 0.92 0.87 395
weighted avg 0.92 0.89 0.89 395
, precision recall f1-score support
cancer 0.98 0.91 0.94 121
normal 0.58 0.88 0.70 17
accuracy 0.91 138
macro avg 0.78 0.90 0.82 138
weighted avg 0.93 0.91 0.91 138
_x000D_ 7,0.7/0.3,414,44,SMOTEENN,260,80,121,17,yes,0.9057971014492754, precision recall f1-score support
cancer 0.95 0.98 0.96 260
normal 0.92 0.84 0.88 80
accuracy 0.94 340
macro avg 0.93 0.91 0.92 340
weighted avg 0.94 0.94 0.94 340
, precision recall f1-score support
cancer 0.96 0.93 0.95 121
normal 0.60 0.71 0.65 17
accuracy 0.91 138
macro avg 0.78 0.82 0.80 138
weighted avg 0.91 0.91 0.91 138
_x000D_ 7,0.7/0.3,414,44,No Balancing,293,27,121,17,yes,0.9057971014492754, precision recall f1-score support
cancer 0.96 0.99 0.97 293
normal 0.83 0.56 0.67 27
accuracy 0.95 320
macro avg 0.90 0.77 0.82 320
weighted avg 0.95 0.95 0.95 320
, precision recall f1-score support
cancer 0.92 0.98 0.95 121
normal 0.70 0.41 0.52 17
accuracy 0.91 138
macro avg 0.81 0.69 0.73 138
weighted avg 0.89 0.91 0.89 138
_x000D_ 7,0.7/0.3,414,44,SMOTEENN,260,80,121,17,no,0.9057971014492754, precision recall f1-score support
cancer 0.95 0.98 0.96 260
normal 0.92 0.84 0.88 80
accuracy 0.94 340
macro avg 0.93 0.91 0.92 340
weighted avg 0.94 0.94 0.94 340
, precision recall f1-score support
cancer 0.96 0.93 0.95 121
normal 0.60 0.71 0.65 17
accuracy 0.91 138
macro avg 0.78 0.82 0.80 138
weighted avg 0.91 0.91 0.91 138
_x000D_ 7,0.7/0.3,414,44,No Balancing,293,27,121,17,no,0.9057971014492754, precision recall f1-score support
cancer 0.96 0.99 0.97 293
normal 0.83 0.56 0.67 27
accuracy 0.95 320
macro avg 0.90 0.77 0.82 320
weighted avg 0.95 0.95 0.95 320
, precision recall f1-score support
cancer 0.92 0.98 0.95 121
normal 0.70 0.41 0.52 17
accuracy 0.91 138
macro avg 0.81 0.69 0.73 138
weighted avg 0.89 0.91 0.89 138
_x000D_ 4,0.7/0.3,414,44,KMeansSMOTE,293,102,121,17,yes,0.9057971014492754, precision recall f1-score support
cancer 0.96 0.97 0.96 293
normal 0.91 0.88 0.90 102
accuracy 0.95 395
macro avg 0.93 0.93 0.93 395
weighted avg 0.95 0.95 0.95 395
, precision recall f1-score support
cancer 0.93 0.97 0.95 121
normal 0.67 0.47 0.55 17
accuracy 0.91 138
macro avg 0.80 0.72 0.75 138
weighted avg 0.90 0.91 0.90 138
_x000D_ 4,0.6/0.4,414,44,BorderlineSMOTE,251,82,163,21,no,0.9021739130434783, precision recall f1-score support
cancer 0.93 0.94 0.94 251
normal 0.81 0.79 0.80 82
accuracy 0.90 333
macro avg 0.87 0.87 0.87 333
weighted avg 0.90 0.90 0.90 333
, precision recall f1-score support
cancer 0.96 0.93 0.94 163
normal 0.56 0.71 0.62 21
accuracy 0.90 184
macro avg 0.76 0.82 0.78 184
weighted avg 0.92 0.90 0.91 184
_x000D_ 7,0.6/0.4,414,44,RandomOverSampler,251,87,163,21,no,0.9021739130434783, precision recall f1-score support
cancer 0.90 0.96 0.93 251
normal 0.87 0.69 0.77 87
accuracy 0.89 338
macro avg 0.88 0.83 0.85 338
weighted avg 0.89 0.89 0.89 338
, precision recall f1-score support
cancer 0.96 0.93 0.94 163
normal 0.56 0.67 0.61 21
accuracy 0.90 184
macro avg 0.76 0.80 0.78 184
weighted avg 0.91 0.90 0.91 184
_x000D_ 7,0.8/0.2,414,44,No Balancing,333,33,81,11,no,0.9021739130434783, precision recall f1-score support
cancer 0.95 0.99 0.97 333
normal 0.81 0.52 0.63 33
accuracy 0.95 366
macro avg 0.88 0.75 0.80 366
weighted avg 0.94 0.95 0.94 366
, precision recall f1-score support
cancer 0.93 0.96 0.95 81
normal 0.62 0.45 0.53 11
accuracy 0.90 92
macro avg 0.78 0.71 0.74 92
weighted avg 0.89 0.90 0.90 92
_x000D_ 7,0.8/0.2,414,44,RandomOverSampler,333,116,81,11,no,0.9021739130434783, precision recall f1-score support
cancer 0.90 0.93 0.92 333
normal 0.79 0.72 0.75 116
accuracy 0.88 449
macro avg 0.85 0.82 0.83 449
weighted avg 0.87 0.88 0.88 449
, precision recall f1-score support
cancer 0.96 0.93 0.94 81
normal 0.57 0.73 0.64 11
accuracy 0.90 92
macro avg 0.77 0.83 0.79 92
weighted avg 0.91 0.90 0.91 92
_x000D_ 139,0.8/0.2,414,44,BorderlineSMOTE,333,109,81,11,no,0.9021739130434783, precision recall f1-score support
cancer 0.99 0.89 0.94 333
normal 0.75 0.97 0.84 109
accuracy 0.91 442
macro avg 0.87 0.93 0.89 442
weighted avg 0.93 0.91 0.92 442
, precision recall f1-score support
cancer 0.97 0.91 0.94 81
normal 0.56 0.82 0.67 11
accuracy 0.90 92
macro avg 0.77 0.87 0.80 92
weighted avg 0.92 0.90 0.91 92
_x000D_ 4,0.8/0.2,414,44,No Balancing,333,33,81,11,yes,0.9021739130434783, precision recall f1-score support
cancer 0.95 0.97 0.96 333
normal 0.63 0.52 0.57 33
accuracy 0.93 366
macro avg 0.79 0.74 0.76 366
weighted avg 0.92 0.93 0.93 366
, precision recall f1-score support
cancer 0.95 0.94 0.94 81
normal 0.58 0.64 0.61 11
accuracy 0.90 92
macro avg 0.77 0.79 0.78 92
weighted avg 0.91 0.90 0.90 92
_x000D_ 4,0.8/0.2,414,44,No Balancing,333,33,81,11,no,0.9021739130434783, precision recall f1-score support
cancer 0.95 0.97 0.96 333
normal 0.63 0.52 0.57 33
accuracy 0.93 366
macro avg 0.79 0.74 0.76 366
weighted avg 0.92 0.93 0.93 366
, precision recall f1-score support
cancer 0.95 0.94 0.94 81
normal 0.58 0.64 0.61 11
accuracy 0.90 92
macro avg 0.77 0.79 0.78 92
weighted avg 0.91 0.90 0.90 92
_x000D_ 4,0.6/0.4,414,44,BorderlineSMOTE,251,82,163,21,yes,0.9021739130434783, precision recall f1-score support
cancer 0.93 0.94 0.94 251
normal 0.81 0.79 0.80 82
accuracy 0.90 333
macro avg 0.87 0.87 0.87 333
weighted avg 0.90 0.90 0.90 333
, precision recall f1-score support
cancer 0.96 0.93 0.94 163
normal 0.56 0.71 0.62 21
accuracy 0.90 184
macro avg 0.76 0.82 0.78 184
weighted avg 0.92 0.90 0.91 184
_x000D_ 7,0.6/0.4,414,44,RandomOverSampler,251,87,163,21,yes,0.9021739130434783, precision recall f1-score support
cancer 0.90 0.96 0.93 251
normal 0.87 0.69 0.77 87
accuracy 0.89 338
macro avg 0.88 0.83 0.85 338
weighted avg 0.89 0.89 0.89 338
, precision recall f1-score support
cancer 0.96 0.93 0.94 163
normal 0.56 0.67 0.61 21
accuracy 0.90 184
macro avg 0.76 0.80 0.78 184
weighted avg 0.91 0.90 0.91 184
_x000D_ 7,0.8/0.2,414,44,RandomOverSampler,333,116,81,11,yes,0.9021739130434783, precision recall f1-score support
cancer 0.90 0.93 0.92 333
normal 0.79 0.72 0.75 116
accuracy 0.88 449
macro avg 0.85 0.82 0.83 449
weighted avg 0.87 0.88 0.88 449
, precision recall f1-score support
cancer 0.96 0.93 0.94 81
normal 0.57 0.73 0.64 11
accuracy 0.90 92
macro avg 0.77 0.83 0.79 92
weighted avg 0.91 0.90 0.91 92
_x000D_ 7,0.8/0.2,414,44,No Balancing,333,33,81,11,yes,0.9021739130434783, precision recall f1-score support
cancer 0.95 0.99 0.97 333
normal 0.81 0.52 0.63 33
accuracy 0.95 366
macro avg 0.88 0.75 0.80 366
weighted avg 0.94 0.95 0.94 366
, precision recall f1-score support
cancer 0.93 0.96 0.95 81
normal 0.62 0.45 0.53 11
accuracy 0.90 92
macro avg 0.78 0.71 0.74 92
weighted avg 0.89 0.90 0.90 92
_x000D_ 139,0.8/0.2,414,44,BorderlineSMOTE,333,109,81,11,yes,0.9021739130434783, precision recall f1-score support
cancer 0.99 0.89 0.94 333
normal 0.75 0.97 0.84 109
accuracy 0.91 442
macro avg 0.87 0.93 0.89 442
weighted avg 0.93 0.91 0.92 442
, precision recall f1-score support
cancer 0.97 0.91 0.94 81
normal 0.56 0.82 0.67 11
accuracy 0.90 92
macro avg 0.77 0.87 0.80 92
weighted avg 0.92 0.90 0.91 92
_x000D_ 13,0.7/0.3,414,44,SMOTEENN,266,78,121,17,yes,0.8985507246376812, precision recall f1-score support
cancer 1.00 0.93 0.96 266
normal 0.81 1.00 0.90 78
accuracy 0.95 344
macro avg 0.91 0.97 0.93 344
weighted avg 0.96 0.95 0.95 344
, precision recall f1-score support
cancer 0.98 0.90 0.94 121
normal 0.56 0.88 0.68 17
accuracy 0.90 138
macro avg 0.77 0.89 0.81 138
weighted avg 0.93 0.90 0.91 138
_x000D_ 13,0.7/0.3,414,44,SMOTEENN,266,78,121,17,no,0.8985507246376812, precision recall f1-score support
cancer 1.00 0.93 0.96 266
normal 0.81 1.00 0.90 78
accuracy 0.95 344
macro avg 0.91 0.97 0.93 344
weighted avg 0.96 0.95 0.95 344
, precision recall f1-score support
cancer 0.98 0.90 0.94 121
normal 0.56 0.88 0.68 17
accuracy 0.90 138
macro avg 0.77 0.89 0.81 138
weighted avg 0.93 0.90 0.91 138
_x000D_ 4,0.6/0.4,414,44,SMOTEENN,222,56,163,21,yes,0.8967391304347826, precision recall f1-score support
cancer 0.96 0.99 0.97 222
normal 0.96 0.82 0.88 56
accuracy 0.96 278
macro avg 0.96 0.91 0.93 278
weighted avg 0.96 0.96 0.96 278
, precision recall f1-score support
cancer 0.96 0.92 0.94 163
normal 0.54 0.71 0.61 21
accuracy 0.90 184
macro avg 0.75 0.82 0.78 184
weighted avg 0.91 0.90 0.90 184
_x000D_ 4,0.6/0.4,414,44,SMOTEENN,222,56,163,21,no,0.8967391304347826, precision recall f1-score support
cancer 0.96 0.99 0.97 222
normal 0.96 0.82 0.88 56
accuracy 0.96 278
macro avg 0.96 0.91 0.93 278
weighted avg 0.96 0.96 0.96 278
, precision recall f1-score support
cancer 0.96 0.92 0.94 163
normal 0.54 0.71 0.61 21
accuracy 0.90 184
macro avg 0.75 0.82 0.78 184
weighted avg 0.91 0.90 0.90 184
_x000D_ 4,0.8/0.2,414,44,KMeansSMOTE,333,116,81,11,no,0.8913043478260869, precision recall f1-score support
cancer 0.95 0.98 0.96 333
normal 0.93 0.86 0.89 116
accuracy 0.95 449
macro avg 0.94 0.92 0.93 449
weighted avg 0.95 0.95 0.95 449
, precision recall f1-score support
cancer 0.94 0.94 0.94 81
normal 0.55 0.55 0.55 11
accuracy 0.89 92
macro avg 0.74 0.74 0.74 92
weighted avg 0.89 0.89 0.89 92
_x000D_ 7,0.8/0.2,414,44,SMOTEENN,293,93,81,11,yes,0.8913043478260869, precision recall f1-score support
cancer 0.96 0.97 0.96 293
normal 0.91 0.86 0.88 93
accuracy 0.95 386
macro avg 0.93 0.92 0.92 386
weighted avg 0.94 0.95 0.95 386
, precision recall f1-score support
cancer 0.96 0.91 0.94 81
normal 0.53 0.73 0.62 11
accuracy 0.89 92
macro avg 0.75 0.82 0.78 92
weighted avg 0.91 0.89 0.90 92
_x000D_ 13,0.8/0.2,414,44,BorderlineSMOTE,333,109,81,11,no,0.8913043478260869, precision recall f1-score support
cancer 1.00 0.84 0.91 333
normal 0.67 0.99 0.80 109
accuracy 0.88 442
macro avg 0.83 0.92 0.86 442
weighted avg 0.92 0.88 0.88 442
, precision recall f1-score support
cancer 0.99 0.89 0.94 81
normal 0.53 0.91 0.67 11
accuracy 0.89 92
macro avg 0.76 0.90 0.80 92
weighted avg 0.93 0.89 0.90 92
_x000D_ 13,0.8/0.2,414,44,BorderlineSMOTE,333,109,81,11,yes,0.8913043478260869, precision recall f1-score support
cancer 1.00 0.84 0.91 333
normal 0.67 0.99 0.80 109
accuracy 0.88 442
macro avg 0.83 0.92 0.86 442
weighted avg 0.92 0.88 0.88 442
, precision recall f1-score support
cancer 0.99 0.89 0.94 81
normal 0.53 0.91 0.67 11
accuracy 0.89 92
macro avg 0.76 0.90 0.80 92
weighted avg 0.93 0.89 0.90 92
_x000D_ 13,0.7/0.3,414,44,BorderlineSMOTE,293,96,121,17,yes,0.8913043478260869, precision recall f1-score support
cancer 1.00 0.84 0.91 293
normal 0.66 0.99 0.79 96
accuracy 0.87 389
macro avg 0.83 0.91 0.85 389
weighted avg 0.91 0.87 0.88 389
, precision recall f1-score support
cancer 0.98 0.89 0.94 121
normal 0.54 0.88 0.67 17
accuracy 0.89 138
macro avg 0.76 0.89 0.80 138
weighted avg 0.93 0.89 0.90 138
_x000D_ 13,0.7/0.3,414,44,BorderlineSMOTE,293,96,121,17,no,0.8913043478260869, precision recall f1-score support
cancer 1.00 0.84 0.91 293
normal 0.66 0.99 0.79 96
accuracy 0.87 389
macro avg 0.83 0.91 0.85 389
weighted avg 0.91 0.87 0.88 389
, precision recall f1-score support
cancer 0.98 0.89 0.94 121
normal 0.54 0.88 0.67 17
accuracy 0.89 138
macro avg 0.76 0.89 0.80 138
weighted avg 0.93 0.89 0.90 138
_x000D_ 7,0.7/0.3,414,44,RandomOverSampler,293,102,121,17,yes,0.8913043478260869, precision recall f1-score support
cancer 0.88 0.93 0.91 293
normal 0.77 0.65 0.70 102
accuracy 0.86 395
macro avg 0.83 0.79 0.80 395
weighted avg 0.85 0.86 0.85 395
, precision recall f1-score support
cancer 0.96 0.92 0.94 121
normal 0.55 0.71 0.62 17
accuracy 0.89 138
macro avg 0.75 0.81 0.78 138
weighted avg 0.91 0.89 0.90 138
_x000D_ 4,0.7/0.3,414,44,RandomOverSampler,293,102,121,17,no,0.8913043478260869, precision recall f1-score support
cancer 0.87 0.95 0.91 293
normal 0.80 0.59 0.68 102
accuracy 0.86 395
macro avg 0.83 0.77 0.79 395
weighted avg 0.85 0.86 0.85 395
, precision recall f1-score support
cancer 0.95 0.93 0.94 121
normal 0.55 0.65 0.59 17
accuracy 0.89 138
macro avg 0.75 0.79 0.77 138
weighted avg 0.90 0.89 0.90 138
_x000D_ 7,0.8/0.2,414,44,SMOTEENN,293,93,81,11,no,0.8913043478260869, precision recall f1-score support
cancer 0.96 0.97 0.96 293
normal 0.91 0.86 0.88 93
accuracy 0.95 386
macro avg 0.93 0.92 0.92 386
weighted avg 0.94 0.95 0.95 386
, precision recall f1-score support
cancer 0.96 0.91 0.94 81
normal 0.53 0.73 0.62 11
accuracy 0.89 92
macro avg 0.75 0.82 0.78 92
weighted avg 0.91 0.89 0.90 92
_x000D_ 4,0.8/0.2,414,44,KMeansSMOTE,333,116,81,11,yes,0.8913043478260869, precision recall f1-score support
cancer 0.95 0.98 0.96 333
normal 0.93 0.86 0.89 116
accuracy 0.95 449
macro avg 0.94 0.92 0.93 449
weighted avg 0.95 0.95 0.95 449
, precision recall f1-score support
cancer 0.94 0.94 0.94 81
normal 0.55 0.55 0.55 11
accuracy 0.89 92
macro avg 0.74 0.74 0.74 92
weighted avg 0.89 0.89 0.89 92
_x000D_ 7,0.7/0.3,414,44,RandomOverSampler,293,102,121,17,no,0.8913043478260869, precision recall f1-score support
cancer 0.88 0.93 0.91 293
normal 0.77 0.65 0.70 102
accuracy 0.86 395
macro avg 0.83 0.79 0.80 395
weighted avg 0.85 0.86 0.85 395
, precision recall f1-score support
cancer 0.96 0.92 0.94 121
normal 0.55 0.71 0.62 17
accuracy 0.89 138
macro avg 0.75 0.81 0.78 138
weighted avg 0.91 0.89 0.90 138
_x000D_ 4,0.7/0.3,414,44,SMOTEENN,257,54,121,17,yes,0.8913043478260869, precision recall f1-score support
cancer 0.96 0.99 0.98 257
normal 0.94 0.81 0.87 54
accuracy 0.96 311
macro avg 0.95 0.90 0.92 311
weighted avg 0.96 0.96 0.96 311
, precision recall f1-score support
cancer 0.95 0.93 0.94 121
normal 0.55 0.65 0.59 17
accuracy 0.89 138
macro avg 0.75 0.79 0.77 138
weighted avg 0.90 0.89 0.90 138
_x000D_ 4,0.7/0.3,414,44,RandomOverSampler,293,102,121,17,yes,0.8913043478260869, precision recall f1-score support
cancer 0.87 0.95 0.91 293
normal 0.80 0.59 0.68 102
accuracy 0.86 395
macro avg 0.83 0.77 0.79 395
weighted avg 0.85 0.86 0.85 395
, precision recall f1-score support
cancer 0.95 0.93 0.94 121
normal 0.55 0.65 0.59 17
accuracy 0.89 138
macro avg 0.75 0.79 0.77 138
weighted avg 0.90 0.89 0.90 138
_x000D_ 4,0.7/0.3,414,44,SMOTEENN,257,54,121,17,no,0.8913043478260869, precision recall f1-score support
cancer 0.96 0.99 0.98 257
normal 0.94 0.81 0.87 54
accuracy 0.96 311
macro avg 0.95 0.90 0.92 311
weighted avg 0.96 0.96 0.96 311
, precision recall f1-score support
cancer 0.95 0.93 0.94 121
normal 0.55 0.65 0.59 17
accuracy 0.89 138
macro avg 0.75 0.79 0.77 138
weighted avg 0.90 0.89 0.90 138
_x000D_ 4,0.7/0.3,414,44,No Balancing,293,27,121,17,yes,0.8840579710144928, precision recall f1-score support
cancer 0.94 0.99 0.97 293
normal 0.82 0.33 0.47 27
accuracy 0.94 320
macro avg 0.88 0.66 0.72 320
weighted avg 0.93 0.94 0.93 320
, precision recall f1-score support
cancer 0.90 0.98 0.94 121
normal 0.57 0.24 0.33 17
accuracy 0.88 138
macro avg 0.74 0.61 0.63 138
weighted avg 0.86 0.88 0.86 138
_x000D_ 4,0.7/0.3,414,44,BorderlineSMOTE,293,96,121,17,yes,0.8840579710144928, precision recall f1-score support
cancer 0.94 0.93 0.93 293
normal 0.79 0.81 0.80 96
accuracy 0.90 389
macro avg 0.86 0.87 0.87 389
weighted avg 0.90 0.90 0.90 389
, precision recall f1-score support
cancer 0.96 0.91 0.93 121
normal 0.52 0.71 0.60 17
accuracy 0.88 138
macro avg 0.74 0.81 0.77 138
weighted avg 0.90 0.88 0.89 138
_x000D_ 4,0.7/0.3,414,44,BorderlineSMOTE,293,96,121,17,no,0.8840579710144928, precision recall f1-score support
cancer 0.94 0.93 0.93 293
normal 0.79 0.81 0.80 96
accuracy 0.90 389
macro avg 0.86 0.87 0.87 389
weighted avg 0.90 0.90 0.90 389
, precision recall f1-score support
cancer 0.96 0.91 0.93 121
normal 0.52 0.71 0.60 17
accuracy 0.88 138
macro avg 0.74 0.81 0.77 138
weighted avg 0.90 0.88 0.89 138
_x000D_ 4,0.7/0.3,414,44,No Balancing,293,27,121,17,no,0.8840579710144928, precision recall f1-score support
cancer 0.94 0.99 0.97 293
normal 0.82 0.33 0.47 27
accuracy 0.94 320
macro avg 0.88 0.66 0.72 320
weighted avg 0.93 0.94 0.93 320
, precision recall f1-score support
cancer 0.90 0.98 0.94 121
normal 0.57 0.24 0.33 17
accuracy 0.88 138
macro avg 0.74 0.61 0.63 138
weighted avg 0.86 0.88 0.86 138
_x000D_ 139,0.8/0.2,414,44,KMeansSMOTE,333,116,81,11,no,0.8804347826086957, precision recall f1-score support
cancer 0.94 1.00 0.97 333
normal 1.00 0.80 0.89 116
accuracy 0.95 449
macro avg 0.97 0.90 0.93 449
weighted avg 0.95 0.95 0.95 449
, precision recall f1-score support
cancer 0.89 0.99 0.94 81
normal 0.50 0.09 0.15 11
accuracy 0.88 92
macro avg 0.69 0.54 0.54 92
weighted avg 0.84 0.88 0.84 92
_x000D_ 139,0.8/0.2,414,44,KMeansSMOTE,333,116,81,11,yes,0.8804347826086957, precision recall f1-score support
cancer 0.94 1.00 0.97 333
normal 1.00 0.80 0.89 116
accuracy 0.95 449
macro avg 0.97 0.90 0.93 449
weighted avg 0.95 0.95 0.95 449
, precision recall f1-score support
cancer 0.89 0.99 0.94 81
normal 0.50 0.09 0.15 11
accuracy 0.88 92
macro avg 0.69 0.54 0.54 92
weighted avg 0.84 0.88 0.84 92
_x000D_ 7,0.7/0.3,414,44,BorderlineSMOTE,293,96,121,17,yes,0.8768115942028986, precision recall f1-score support
cancer 0.99 0.93 0.96 293
normal 0.82 0.96 0.88 96
accuracy 0.94 389
macro avg 0.90 0.95 0.92 389
weighted avg 0.95 0.94 0.94 389
, precision recall f1-score support
cancer 0.96 0.89 0.93 121
normal 0.50 0.76 0.60 17
accuracy 0.88 138
macro avg 0.73 0.83 0.77 138
weighted avg 0.91 0.88 0.89 138
_x000D_ 7,0.7/0.3,414,44,BorderlineSMOTE,293,96,121,17,no,0.8768115942028986, precision recall f1-score support
cancer 0.99 0.93 0.96 293
normal 0.82 0.96 0.88 96
accuracy 0.94 389
macro avg 0.90 0.95 0.92 389
weighted avg 0.95 0.94 0.94 389
, precision recall f1-score support
cancer 0.96 0.89 0.93 121
normal 0.50 0.76 0.60 17
accuracy 0.88 138
macro avg 0.73 0.83 0.77 138
weighted avg 0.91 0.88 0.89 138
_x000D_ 13,0.6/0.4,414,44,RandomOverSampler,251,87,163,21,yes,0.875, precision recall f1-score support
cancer 0.99 0.86 0.92 251
normal 0.70 0.98 0.82 87
accuracy 0.89 338
macro avg 0.85 0.92 0.87 338
weighted avg 0.92 0.89 0.89 338
, precision recall f1-score support
cancer 0.99 0.87 0.93 163
normal 0.47 0.90 0.62 21
accuracy 0.88 184
macro avg 0.73 0.89 0.77 184
weighted avg 0.93 0.88 0.89 184
_x000D_ 7,0.6/0.4,414,44,BorderlineSMOTE,251,82,163,21,yes,0.875, precision recall f1-score support
cancer 0.98 0.94 0.96 251
normal 0.85 0.95 0.90 82
accuracy 0.95 333
macro avg 0.92 0.95 0.93 333
weighted avg 0.95 0.95 0.95 333
, precision recall f1-score support
cancer 0.96 0.90 0.93 163
normal 0.47 0.71 0.57 21
accuracy 0.88 184
macro avg 0.71 0.80 0.75 184
weighted avg 0.90 0.88 0.89 184
_x000D_ 13,0.6/0.4,414,44,SMOTEENN,225,71,163,21,yes,0.875, precision recall f1-score support
cancer 1.00 0.89 0.94 225
normal 0.74 1.00 0.85 71
accuracy 0.92 296
macro avg 0.87 0.94 0.90 296
weighted avg 0.94 0.92 0.92 296
, precision recall f1-score support
cancer 0.99 0.87 0.93 163
normal 0.47 0.90 0.62 21
accuracy 0.88 184
macro avg 0.73 0.89 0.77 184
weighted avg 0.93 0.88 0.89 184
_x000D_ 13,0.6/0.4,414,44,SMOTEENN,225,71,163,21,no,0.875, precision recall f1-score support
cancer 1.00 0.89 0.94 225
normal 0.74 1.00 0.85 71
accuracy 0.92 296
macro avg 0.87 0.94 0.90 296
weighted avg 0.94 0.92 0.92 296
, precision recall f1-score support
cancer 0.99 0.87 0.93 163
normal 0.47 0.90 0.62 21
accuracy 0.88 184
macro avg 0.73 0.89 0.77 184
weighted avg 0.93 0.88 0.89 184
_x000D_ 13,0.6/0.4,414,44,RandomOverSampler,251,87,163,21,no,0.875, precision recall f1-score support
cancer 0.99 0.86 0.92 251
normal 0.70 0.98 0.82 87
accuracy 0.89 338
macro avg 0.85 0.92 0.87 338
weighted avg 0.92 0.89 0.89 338
, precision recall f1-score support
cancer 0.99 0.87 0.93 163
normal 0.47 0.90 0.62 21
accuracy 0.88 184
macro avg 0.73 0.89 0.77 184
weighted avg 0.93 0.88 0.89 184
_x000D_ 7,0.6/0.4,414,44,BorderlineSMOTE,251,82,163,21,no,0.875, precision recall f1-score support
cancer 0.98 0.94 0.96 251
normal 0.85 0.95 0.90 82
accuracy 0.95 333
macro avg 0.92 0.95 0.93 333
weighted avg 0.95 0.95 0.95 333
, precision recall f1-score support
cancer 0.96 0.90 0.93 163
normal 0.47 0.71 0.57 21
accuracy 0.88 184
macro avg 0.71 0.80 0.75 184
weighted avg 0.90 0.88 0.89 184
_x000D_ 4,0.8/0.2,414,44,RandomOverSampler,333,116,81,11,yes,0.8695652173913043, precision recall f1-score support
cancer 0.89 0.93 0.91 333
normal 0.78 0.67 0.72 116
accuracy 0.87 449
macro avg 0.84 0.80 0.82 449
weighted avg 0.86 0.87 0.86 449
, precision recall f1-score support
cancer 0.96 0.89 0.92 81
normal 0.47 0.73 0.57 11
accuracy 0.87 92
macro avg 0.72 0.81 0.75 92
weighted avg 0.90 0.87 0.88 92
_x000D_ 4,0.8/0.2,414,44,RandomOverSampler,333,116,81,11,no,0.8695652173913043, precision recall f1-score support
cancer 0.89 0.93 0.91 333
normal 0.78 0.67 0.72 116
accuracy 0.87 449
macro avg 0.84 0.80 0.82 449
weighted avg 0.86 0.87 0.86 449
, precision recall f1-score support
cancer 0.96 0.89 0.92 81
normal 0.47 0.73 0.57 11
accuracy 0.87 92
macro avg 0.72 0.81 0.75 92
weighted avg 0.90 0.87 0.88 92
_x000D_ 4,0.8/0.2,414,44,SMOTEENN,290,71,81,11,no,0.8695652173913043, precision recall f1-score support
cancer 0.97 1.00 0.98 290
normal 0.98 0.87 0.93 71
accuracy 0.97 361
macro avg 0.98 0.93 0.95 361
weighted avg 0.97 0.97 0.97 361
, precision recall f1-score support
cancer 0.96 0.89 0.92 81
normal 0.47 0.73 0.57 11
accuracy 0.87 92
macro avg 0.72 0.81 0.75 92
weighted avg 0.90 0.87 0.88 92
_x000D_ 4,0.8/0.2,414,44,SMOTEENN,290,71,81,11,yes,0.8695652173913043, precision recall f1-score support
cancer 0.97 1.00 0.98 290
normal 0.98 0.87 0.93 71
accuracy 0.97 361
macro avg 0.98 0.93 0.95 361
weighted avg 0.97 0.97 0.97 361
, precision recall f1-score support
cancer 0.96 0.89 0.92 81
normal 0.47 0.73 0.57 11
accuracy 0.87 92
macro avg 0.72 0.81 0.75 92
weighted avg 0.90 0.87 0.88 92
_x000D_ 7,0.6/0.4,414,44,SMOTEENN,221,71,163,21,no,0.8641304347826086, precision recall f1-score support
cancer 0.95 0.98 0.96 221
normal 0.94 0.83 0.88 71
accuracy 0.95 292
macro avg 0.94 0.91 0.92 292
weighted avg 0.94 0.95 0.94 292
, precision recall f1-score support
cancer 0.96 0.88 0.92 163
normal 0.44 0.71 0.55 21
accuracy 0.86 184
macro avg 0.70 0.80 0.73 184
weighted avg 0.90 0.86 0.88 184
_x000D_ 7,0.6/0.4,414,44,SMOTEENN,221,71,163,21,yes,0.8641304347826086, precision recall f1-score support
cancer 0.95 0.98 0.96 221
normal 0.94 0.83 0.88 71
accuracy 0.95 292
macro avg 0.94 0.91 0.92 292
weighted avg 0.94 0.95 0.94 292
, precision recall f1-score support
cancer 0.96 0.88 0.92 163
normal 0.44 0.71 0.55 21
accuracy 0.86 184
macro avg 0.70 0.80 0.73 184
weighted avg 0.90 0.86 0.88 184
_x000D_ 7,0.8/0.2,414,44,BorderlineSMOTE,333,109,81,11,yes,0.8586956521739131, precision recall f1-score support
cancer 0.99 0.92 0.95 333
normal 0.79 0.96 0.87 109
accuracy 0.93 442
macro avg 0.89 0.94 0.91 442
weighted avg 0.94 0.93 0.93 442
, precision recall f1-score support
cancer 0.96 0.88 0.92 81
normal 0.44 0.73 0.55 11
accuracy 0.86 92
macro avg 0.70 0.80 0.73 92
weighted avg 0.90 0.86 0.87 92
_x000D_ 7,0.8/0.2,414,44,BorderlineSMOTE,333,109,81,11,no,0.8586956521739131, precision recall f1-score support
cancer 0.99 0.92 0.95 333
normal 0.79 0.96 0.87 109
accuracy 0.93 442
macro avg 0.89 0.94 0.91 442
weighted avg 0.94 0.93 0.93 442
, precision recall f1-score support
cancer 0.96 0.88 0.92 81
normal 0.44 0.73 0.55 11
accuracy 0.86 92
macro avg 0.70 0.80 0.73 92
weighted avg 0.90 0.86 0.87 92
_x000D_ 4,0.8/0.2,414,44,BorderlineSMOTE,333,109,81,11,no,0.8586956521739131, precision recall f1-score support
cancer 0.95 0.94 0.94 333
normal 0.82 0.83 0.83 109
accuracy 0.91 442
macro avg 0.88 0.89 0.89 442
weighted avg 0.91 0.91 0.91 442
, precision recall f1-score support
cancer 0.96 0.88 0.92 81
normal 0.44 0.73 0.55 11
accuracy 0.86 92
macro avg 0.70 0.80 0.73 92
weighted avg 0.90 0.86 0.87 92
_x000D_ 4,0.8/0.2,414,44,BorderlineSMOTE,333,109,81,11,yes,0.8586956521739131, precision recall f1-score support
cancer 0.95 0.94 0.94 333
normal 0.82 0.83 0.83 109
accuracy 0.91 442
macro avg 0.88 0.89 0.89 442
weighted avg 0.91 0.91 0.91 442
, precision recall f1-score support
cancer 0.96 0.88 0.92 81
normal 0.44 0.73 0.55 11
accuracy 0.86 92
macro avg 0.70 0.80 0.73 92
weighted avg 0.90 0.86 0.87 92
_x000D_ 13,0.6/0.4,414,44,BorderlineSMOTE,251,82,163,21,no,0.842391304347826, precision recall f1-score support
cancer 1.00 0.83 0.90 251
normal 0.65 0.99 0.79 82
accuracy 0.87 333
macro avg 0.82 0.91 0.85 333
weighted avg 0.91 0.87 0.88 333
, precision recall f1-score support
cancer 0.99 0.83 0.90 163
normal 0.42 0.95 0.58 21
accuracy 0.84 184
macro avg 0.70 0.89 0.74 184
weighted avg 0.93 0.84 0.87 184
_x000D_ 13,0.6/0.4,414,44,BorderlineSMOTE,251,82,163,21,yes,0.842391304347826, precision recall f1-score support
cancer 1.00 0.83 0.90 251
normal 0.65 0.99 0.79 82
accuracy 0.87 333
macro avg 0.82 0.91 0.85 333
weighted avg 0.91 0.87 0.88 333
, precision recall f1-score support
cancer 0.99 0.83 0.90 163
normal 0.42 0.95 0.58 21
accuracy 0.84 184
macro avg 0.70 0.89 0.74 184
weighted avg 0.93 0.84 0.87 184
_x000D_
